# Supplementary material
Source: PubMed Central journal article supplement (PMC3970981)
Supplement: NIHMS3967-supplement-1.pdf [file NIHMS3967-supplement-1.pdf]

## Supplementary information

### **Metabolic suppression identifies new antibacterial inhibitors under nutrient limitation**

Zlitni, S.<sup>1,2</sup>, Ferruccio, L.F.<sup>2,3</sup> and Brown, E.D.<sup>1,2,\*</sup>

<sup>1</sup> Department of Biochemistry and Biomedical Sciences, McMaster University, Hamilton, Ontario L8N 3Z5, Canada.

<sup>2</sup> Michael G. DeGroote Institute of Infectious Disease Research, McMaster University, Hamilton, Ontario L8N 3Z5, Canada.

<sup>3</sup> Department of Chemistry and Chemical Biology, McMaster University, Hamilton, Ontario L8S 4M1, Canada.

\* To whom correspondence should be addressed.

## SUPPLEMENTARY RESULTS

### 1. SUPPLEMENTARY TABLES

Supplementary Table 1. Small molecule screening data

| Category                 | Parameter                                                       | Description                                                                                         |
|--------------------------|-----------------------------------------------------------------|-----------------------------------------------------------------------------------------------------|
| <b>Assay</b>             | Type of assay                                                   | Cell-based                                                                                          |
|                          | Target                                                          | Whole organism <i>E. coli</i> K-12 MG1655                                                           |
|                          | Primary measurement                                             | Measurement of optical density at 600 nm                                                            |
|                          | Assay protocol                                                  | Online methods section 'Primary screen in minimal media'                                            |
| <b>Library</b>           | Library size                                                    | 29,569                                                                                              |
|                          | Library composition                                             | Synthetic small molecules, off-patent FDA approved molecules, natural products and known bioactives |
|                          | Source                                                          | Maybridge, ChemBridge, BioMol, Prestwick, Sigma, MicroSource                                        |
|                          | Additional comments                                             | Library stock concentration: 250 $\mu$ M in 25% DMSO                                                |
| <b>Screen</b>            | Format                                                          | 96-well plates (Costar), 3 replicates                                                               |
|                          | Concentration(s) tested                                         | 10 $\mu$ M, 0.2% DMSO                                                                               |
|                          | Plate controls                                                  | High controls: 0.2% DMSO<br>Low controls: 10 $\mu$ g/ml of norfloxacin                              |
|                          | Reagent/ compound dispensing system                             | Biomek FX liquid handler (Beckman Coulter Inc., Fullerton, CA)                                      |
|                          | Detection instrument and software                               | Envision (Perkin Elmer, Waltham, MA)                                                                |
|                          | Assay validation/QC                                             | Average (n=3) Z' score: 0.8                                                                         |
|                          | Correction factors                                              | Optical density readings are background corrected                                                   |
| Normalization            | % Residual growth calculated based on the high and low controls |                                                                                                     |
| <b>Post-HTS analysis</b> | Hit criteria                                                    | 80% Residual growth for the 3 replicate measurements                                                |
|                          | Hit rate                                                        | 1.7%                                                                                                |
|                          | Additional assay(s)                                             | Dose-response and MIC determinations                                                                |
|                          | Confirmation of hit purity and structure                        | Compounds repurchased and retested, identity of key hits confirmed by LC/MS and NMR                 |

Supplementary Table 2. Defined minimal media composition <sup>a</sup>

| Supplement                       | Final conc. in M9 media (µg/ml) | Notes                   |
|----------------------------------|---------------------------------|-------------------------|
| <b>Amino Acids</b>               |                                 |                         |
| DL-Alanine                       | 100                             |                         |
| L-Arginine                       | 22                              |                         |
| L-Asparagine                     | 100                             |                         |
| L-Aspartic acid                  | 100                             |                         |
| L-Cysteine                       | 10                              |                         |
| Glycine                          | 100                             |                         |
| L-Glutamic acid                  | 100                             |                         |
| L-Glutamine                      | 100                             |                         |
| L-Histidine                      | 22                              |                         |
| L-Isoleucine                     | 20                              |                         |
| L-Leucine                        | 20                              |                         |
| L-Lysine                         | 88                              |                         |
| L-Methionine                     | 20                              |                         |
| L-Phenylalanine                  | 20                              | Prepare in 0.001 N NaOH |
| L-Proline                        | 30                              |                         |
| L-Serine                         | 100                             |                         |
| L-Threonine                      | 80                              |                         |
| L-Tryptophan                     | 20                              |                         |
| L-Tyrosine                       | 20                              | Prepare in 0.01 N NaOH  |
| L-Valine                         | 40                              |                         |
| <b>Purines &amp; Pyrimidines</b> |                                 |                         |
| Adenine (A)                      | 40                              | Prepare in 0.03 N HCl   |
| Thymidine (T)                    | 5                               |                         |
| Uracil (U)                       | 40                              |                         |
| Guanosine (G)                    | 40                              |                         |
| <b>Vitamins</b>                  |                                 |                         |
| Biotin (B7)                      | 0.5                             |                         |
| Niacin (B3)                      | 1                               |                         |

|                                         |     |                                           |
|-----------------------------------------|-----|-------------------------------------------|
| <b>Pantothenic acid (B5)</b>            | 1   |                                           |
| <b>Pyridoxine (B6)</b>                  | 1   |                                           |
| <b>Thiamine (B1)</b>                    | 1   |                                           |
| <b>Riboflavin (B2)</b>                  | 200 |                                           |
| <b>PABA</b>                             | 2   |                                           |
| <b>Cobalamin (B12)</b>                  | 10  |                                           |
| <hr/>                                   |     |                                           |
| <b>Other intermediates</b>              |     |                                           |
| <b>2,6- Diaminopimelate (DAP)</b>       | 100 |                                           |
| <b>L-Homoserine</b>                     | 20  |                                           |
| <b>5-Aminolevulinic acid (5-ALA)</b>    | 25  |                                           |
| <b>3- Dehydroquinate (DHQ)</b>          | 100 |                                           |
| <b>Shikimate (SHIK)</b>                 | 100 |                                           |
| <b>4-Hydroxybenzoate (4-HBA)</b>        | 15  |                                           |
| <b>2,3-Dihydroxybenzoate (2,3-DHBA)</b> | 2   |                                           |
| <b>Citrulline</b>                       | 15  |                                           |
| <b>Ornithine</b>                        | 15  |                                           |
| <b>Putrescine</b>                       | 20  |                                           |
| <hr/>                                   |     |                                           |
| <b>Pools</b>                            |     |                                           |
| <b>M9 ALL</b>                           |     | All amino acids, vitamins and nucleobases |
| <b>AA</b>                               |     | All amino acids                           |
| <b>VIT</b>                              |     | All vitamins                              |
| <b>NUC</b>                              |     | All nucleobases                           |
| <b>AA + VIT</b>                         |     | All amino acids and vitamins              |
| <b>AA + NUC</b>                         |     | All amino acids and nucleobases           |
| <b>VIT + NUC</b>                        |     | All vitamins and nucleobases              |
| <b>PUR</b>                              |     | Adenine and guanine                       |
| <b>PYR</b>                              |     | Thymine and uracil                        |
| <b>ARO AA</b>                           |     | Tyr, Phe, Trp                             |
| <b>ARO</b>                              |     | Tyr, Phe, Trp, PABA, 2.3-DHBA, 4-HBA      |
| <hr/>                                   |     |                                           |

|                |                                    |
|----------------|------------------------------------|
| <b>Pool 1</b>  | Adenine, His, Phe, Gln, Thymine    |
| <b>Pool 2</b>  | Guanine, Leu, Tyr, Asn, Ser        |
| <b>Pool 3</b>  | Cystine, Ile, Trp, Uracil, Glu     |
| <b>Pool 4</b>  | Met, Lys, Thr, Asp, DAP            |
| <b>Pool 5</b>  | B1, Val, Pro, Arg, Gly, Ile        |
| <b>Pool 6</b>  | Adenine, Guanine, Cystine, Met, B1 |
| <b>Pool 7</b>  | His, Leu, Ile, Lys, Val            |
| <b>Pool 8</b>  | Phe, Tyr, Trp, Thr, Pro            |
| <b>Pool 9</b>  | Gln, Asn, Uracil, Asp, Arg         |
| <b>Pool 10</b> | Thymine, Ser, Glu, DAP, Gly        |

| <b>Trace metal solution</b>              | <b>Weight (g) in 100 ml solution</b> |                                                               |
|------------------------------------------|--------------------------------------|---------------------------------------------------------------|
| <b>FeSO<sub>4</sub>·7H<sub>2</sub>O</b>  | 0.8                                  |                                                               |
| <b>AlCl<sub>3</sub>·6H<sub>2</sub>O</b>  | 0.1                                  |                                                               |
| <b>ZnSO<sub>4</sub>·7H<sub>2</sub>O</b>  | 0.02                                 |                                                               |
| <b>CuCl<sub>2</sub>·2H<sub>2</sub>O</b>  | 0.01                                 | Add 0.1 ml of Trace metal solution in 1 L of M9 minimal media |
| <b>NaMoO<sub>4</sub>·2H<sub>2</sub>O</b> | 0.02                                 |                                                               |
| <b>MnSO<sub>4</sub>·H<sub>2</sub>O</b>   | 0.1                                  |                                                               |
| <b>CoCl<sub>2</sub></b>                  | 0.04                                 |                                                               |
| <b>H<sub>3</sub>BO<sub>4</sub></b>       | 0.005                                |                                                               |

<sup>a</sup> The metabolic suppression array was prepared in the format shown in **Fig. 3a** and in **Supplementary Fig. 4** as a 20× stock plate to be used for metabolic suppression profiling

**Supplementary Table 3. Summary of EC<sub>50</sub> and MIC values of prioritized actives**

| Priority Active | Supplier  | Cat #      | EC <sub>50</sub> (μM) <sup>a</sup> |                     | MIC (μg/ml) <sup>b</sup> |        |
|-----------------|-----------|------------|------------------------------------|---------------------|--------------------------|--------|
|                 |           |            | M9 <sup>c</sup>                    | M9 ALL <sup>c</sup> | M9                       | M9 ALL |
| MAC-0001907     | MayBridge | BR 00067   | 0.5                                | 17.9                | 4                        | 16     |
| MAC-0001908     | MayBridge | BR 00068   | 0.6                                | 18.7                | 8                        | 32     |
| MAC-0001958     | MayBridge | BTB 00183  | 3.1                                | NI                  | 16                       | > 256  |
| MAC-0001961     | MayBridge | BTB 00187  | 0.2                                | 25.6                | 2                        | 32     |
| MAC-0003403     | MayBridge | BTB 03305  | 0.7                                | NI                  | 16                       | > 256  |
| MAC-0005562     | MayBridge | BTB 07373  | 1.5                                | NI                  | 8                        | > 256  |
| MAC-0006191     | MayBridge | BTB 08617  | 0.6                                | NI                  | 4                        | > 256  |
| MAC-0007196     | MayBridge | BTB 11383  | 0.8                                | NI                  | 8                        | > 256  |
| MAC-0007606     | MayBridge | BTB 12380  | 5.1                                | NI                  | 16                       | 256    |
| MAC-0008533     | MayBridge | BTB 14373  | 0.7                                | 13.4                | 2                        | 64     |
| MAC-0008972     | MayBridge | BTB 15053  | 0.9                                | NI                  | 8                        | 256    |
| MAC-0154388     | MayBridge | CD 00793   | 1.1                                | 63.3                | 2                        | 128    |
| MAC-0012416     | MayBridge | CD 11546   | 0.3                                | 13.4                | 1                        | 16     |
| MAC-0012616     | MayBridge | DFP 00022  | 0.7                                | 36.8                | 16                       | 64     |
| MAC-0013015     | MayBridge | DP 00874   | 2.8                                | NI                  | 8                        | > 256  |
| MAC-0013528     | MayBridge | DSHS 00086 | 0.1                                | 6.8                 | 0.5                      | 64     |
| MAC-0013532     | MayBridge | DSHS 00100 | 2.1                                | NI                  | 32                       | > 256  |
| MAC-0013772     | MayBridge | DSHS 00862 | 0.6                                | NI                  | 4                        | > 256  |
| MAC-0016505     | MayBridge | HTS 00495  | 0.1                                | 5.4                 | 0.5                      | > 256  |
| MAC-0018315     | MayBridge | HTS 03738  | 0.2                                | NI                  | 2                        | > 256  |
| MAC-0018316     | MayBridge | HTS 03741  | 1.5                                | NI                  | 32                       | > 256  |
| MAC-0158077     | MayBridge | HTS 08964  | 0.4                                | 73.6                | 32                       | 256    |
| MAC-0021596     | MayBridge | HTS 09781  | 0.7                                | NI                  | 16                       | > 256  |
| MAC-0021835     | MayBridge | JFD 00035  | 0.5                                | 14.4                | 4                        | 128    |
| MAC-0023560     | MayBridge | JFD 02936  | 5.5                                | NI                  | 32                       | > 256  |
| 6-Azauracil     | MayBridge | JFD 03556  | 6.0                                | NI                  | 4                        | > 256  |
| MAC-0024165     | MayBridge | JFD 03885  | 0.4                                | NI                  | 1                        | > 256  |
| MAC-0024593     | MayBridge | KM 00081   | 0.9                                | NI                  | 4                        | > 256  |
| MAC-0160523     | MayBridge | KM 06089   | 4.1                                | NI                  | 8                        | 256    |
| MAC-0161738     | MayBridge | NRB 00886  | 1.0                                | 74.7                | 4                        | 256    |
| MAC-0161992     | MayBridge | NRB 04162  | 4.6                                | NI                  | 32                       | > 256  |

|             |            |           |     |      |     |       |
|-------------|------------|-----------|-----|------|-----|-------|
| MAC-0162065 | MayBridge  | NRB 05081 | 1.8 | NI   | 4   | > 256 |
| MAC-0031448 | MayBridge  | PD 00549  | 0.4 | 16.2 | 4   | 128   |
| MAC-0031946 | MayBridge  | RB 00158  | 0.4 | 35.3 | 8   | 64    |
| MAC-0032479 | MayBridge  | RDR 01288 | 1.3 | 40.4 | 8   | > 256 |
| MAC-0032480 | MayBridge  | RDR 01289 | 2.4 | 71.2 | 16  | > 256 |
| MAC-0033880 | MayBridge  | RF 01653  | 0.9 | NI   | 8   | 128   |
| MAC-0033881 | MayBridge  | RF 01665  | 1.7 | NI   | 32  | 256   |
| MAC-0037439 | MayBridge  | RJC 02623 | 0.2 | 10.3 | 4   | > 256 |
| MAC-0037547 | MayBridge  | RJC 02756 | 3.4 | NI   | 32  | > 256 |
| MAC-0164360 | MayBridge  | RJF 02182 | 0.7 | NI   | 8   | 128   |
| MAC-0039424 | MayBridge  | S 01335   | 1.0 | 24.5 | 8   | 128   |
| MAC-0039804 | MayBridge  | S 04055   | 0.3 | 28.3 | 8   | 128   |
| MAC-0039908 | MayBridge  | S 04548   | 0.0 | 44.7 | 0.5 | 256   |
| MAC-0040158 | MayBridge  | S 07624   | 0.3 | 9.5  | 64  | 2     |
| MAC-0041191 | MayBridge  | S 14125   | 1.6 | 32.3 | 8   | 128   |
| MAC-0041942 | MayBridge  | SEW 00805 | 1.3 | 32.8 | 8   | 128   |
| MAC-0165919 | MayBridge  | SEW 03166 | 0.7 | 47.6 | 16  | 64    |
| MAC-0043268 | MayBridge  | SEW 03585 | 0.3 | 6.9  | 1   | 8     |
| MAC-0000956 | MayBridge  | SPB 01986 | 0.5 | 15.6 | 8   | 128   |
| MAC-0049900 | MayBridge  | SPB 07211 | 0.1 | 5.3  | 0.5 | 128   |
| MAC-0168230 | ChemBridge | 5103499   | 0.7 | NI   | 8   | > 256 |
| MAC-0168195 | ChemBridge | 5102267   | 0.2 | 47.3 | 2   | 64    |
| MAC-0168120 | ChemBridge | 5100353   | 1.0 | NI   | 32  | > 256 |
| MAC-0006508 | ChemBridge | 5110246   | 3.0 | NI   | 32  | > 256 |
| MAC-0168425 | ChemBridge | 5107939   | 1.2 | 53.0 | 8   | 128   |
| MAC-0168466 | ChemBridge | 5109197   | 3.5 | NI   | 128 | > 256 |
| MAC-0168841 | ChemBridge | 5133775   | 0.7 | NI   | 32  | > 256 |
| MAC-0168630 | ChemBridge | 5117127   | 0.5 | NI   | 16  | > 256 |
| MAC-0170171 | ChemBridge | 5217926   | 0.3 | 11.0 | 4   | 32    |
| MAC-0170172 | ChemBridge | 5217929   | 0.3 | 14.4 | 4   | 32    |
| MAC-0170559 | ChemBridge | 5238776   | 1.7 | NI   | 8   | > 256 |
| MAC-0170315 | ChemBridge | 5227194   | 0.6 | 47.1 | 32  | > 256 |
| MAC-0170316 | ChemBridge | 5227196   | 0.5 | NI   | 32  | > 256 |
| MAC-0171530 | ChemBridge | 5283400   | 2.3 | NI   | 16  | > 256 |
| MAC-0171823 | ChemBridge | 5309181   | 3.0 | NI   | 8   | 128   |
| MAC-0172113 | ChemBridge | 5326453   | 0.8 | 41.4 | 4   | 64    |

|                     |             |          |     |      |       |       |
|---------------------|-------------|----------|-----|------|-------|-------|
| MAC-0173979         | ChemBridge  | 5487829  | 0.4 | NI   | 4     | 128   |
| MAC-0176699         | ChemBridge  | 5738215  | 9.9 | NI   | 16    | 256   |
| MAC-0088137         | ChemBridge  | 5930551  | 0.3 | 13.5 | 4     | 64    |
| MAC-0181370         | MicroSource | 01502210 | 0.5 | NI   | 16    | > 256 |
| 6-aminonicotinamide | MicroSource | 01505315 | 0.8 | 39.3 | 4     | > 256 |
| 5-fluorouracil      | MicroSource | 01505317 | 0.0 | 6.5  | 0.125 | 64    |
| MAC-0182554         | MicroSource | 01505368 | 0.6 | 54.4 | 0.5   | > 256 |

<sup>a</sup> The EC<sub>50</sub> determinations were conducted within a concentration range of 1 nM- 80 µM, NI: no inhibition within the tested range (for details on experimental setup and data analysis, see **Online methods**).

<sup>b</sup> MIC determinations were conducted within a concentration range of 0.25- 256 µg/ml (for details on experimental setup and data analysis, see **Online methods**).

<sup>c</sup> M9= Minimal media; M9 ALL= Supplemented minimal media

**Supplementary Table 4: Antibacterial activity of MAC13772 against *E. coli* MG1655 in the presence of intermediates of biotin biosynthesis**

| Supplement <sup>a</sup> | MIC (µg/ml) <sup>b</sup> | Fold suppression <sup>c</sup> |
|-------------------------|--------------------------|-------------------------------|
| None                    | 8                        | -                             |
| AA+VIT+NUC              | > 256                    | 32                            |
| KAPA                    | 8                        | 1                             |
| DAPA                    | > 256                    | 32                            |
| DTB                     | > 256                    | 32                            |
| BIOTIN                  | > 256                    | 32                            |

<sup>a</sup> AA: amino acids, VIT: vitamins, NUC: nucleobases, KAPA: 7-keto-8-aminopelargonate, DAPA: 7,8-diaminopelargonate and DTB: dethiobiotin

<sup>b</sup> MICs were determined as described in **Online methods**. Values are representative of three independent experiments

<sup>c</sup> Fold suppression is the ratio of the MIC in the presence of the supplement to the MIC without supplementation



**Supplementary Table 5. Structures of MAC13772 analogs used in SAR studies**

| Compound        | Structure | Supplier code                     |
|-----------------|-----------|-----------------------------------|
| <b>MAC13772</b> |           | Ryan Scientific<br>DSHS 00862SC   |
| <b>5</b>        |           | Ryan Scientific<br>CAS36107-14-9  |
| <b>6</b>        |           | Ambinter (France)<br>Amb 8998045  |
| <b>7</b>        |           | Ambinter (France)<br>Amb 4065797  |
| <b>8</b>        |           | Ambinter (France)<br>Amb 2336529  |
| <b>9</b>        |           | Ambinter (France)<br>Amb 8858487  |
| <b>10</b>       |           | UORSY<br>BBV-37826735             |
| <b>11</b>       |           | Ambinter (France)<br>Amb 17305609 |
| <b>12</b>       |           | Ambinter (France)<br>Amb 4074830  |
| <b>13</b>       |           | UORSY<br>BBV-37662617             |
| <b>14</b>       |           | Ambinter (France)<br>Amb 7951732  |
| <b>15</b>       |           | UORSY<br>BBV-33761526             |

|    |                                                                                     |                                  |
|----|-------------------------------------------------------------------------------------|----------------------------------|
| 16 | 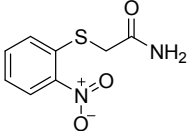   | Ambinter (France)<br>Amb 2795194 |
| 17 |    | Ambinter (France)<br>Amb 2624964 |
| 18 |    | Ambinter (France)<br>Amb 436644  |
| 19 |    | UORSY<br>BBV-39135451            |
| 20 |    | UORSY<br>BBV-37616329            |
| 21 |    | Ambinter (France)<br>Amb 6366352 |
| 22 |    | Ambinter (France)<br>Amb 1104708 |
| 23 |   | Ambinter (France)<br>Amb 1153969 |
| 24 |  | Ambinter (France)<br>Amb 8858703 |
| 25 |  | Ambinter (France)<br>Amb 6550464 |
| 26 |  | Ambinter (France)<br>Amb 4074831 |
| 27 |  | Ambinter (France)<br>Amb 8998355 |
| 28 |  | Ambinter (France)<br>Amb 6739870 |

## 2. SUPPLEMENTARY FIGURES

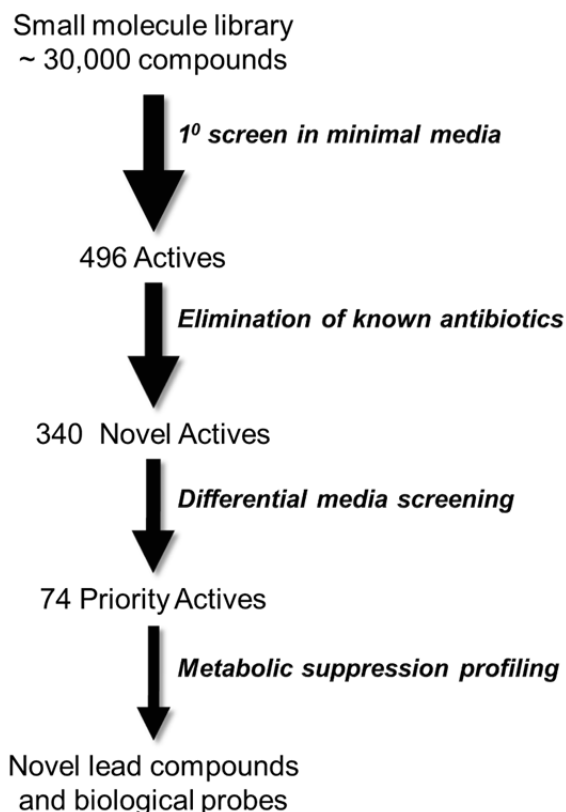

### **Supplementary Fig. 1. General approach to characterize inhibitors of bacterial physiology under nutrient-limited growth conditions.**

A total of 496 compounds that inhibited the growth of *E. coli* MG1655 in minimal media were identified from a high-throughput screen of a library of ~ 30,000 diverse small molecules. After the removal of known antibiotics, a total of 340 novel actives were evaluated in dose-response studies in minimal and supplemented minimal media to identify potent inhibitors with a biological activity specific to bacterial growth under nutrient-limited conditions. From this evaluation, a total of 74 actives were prioritized for metabolic suppression profiling against a panel of primary metabolites to identify the potential target pathways of these inhibitors.

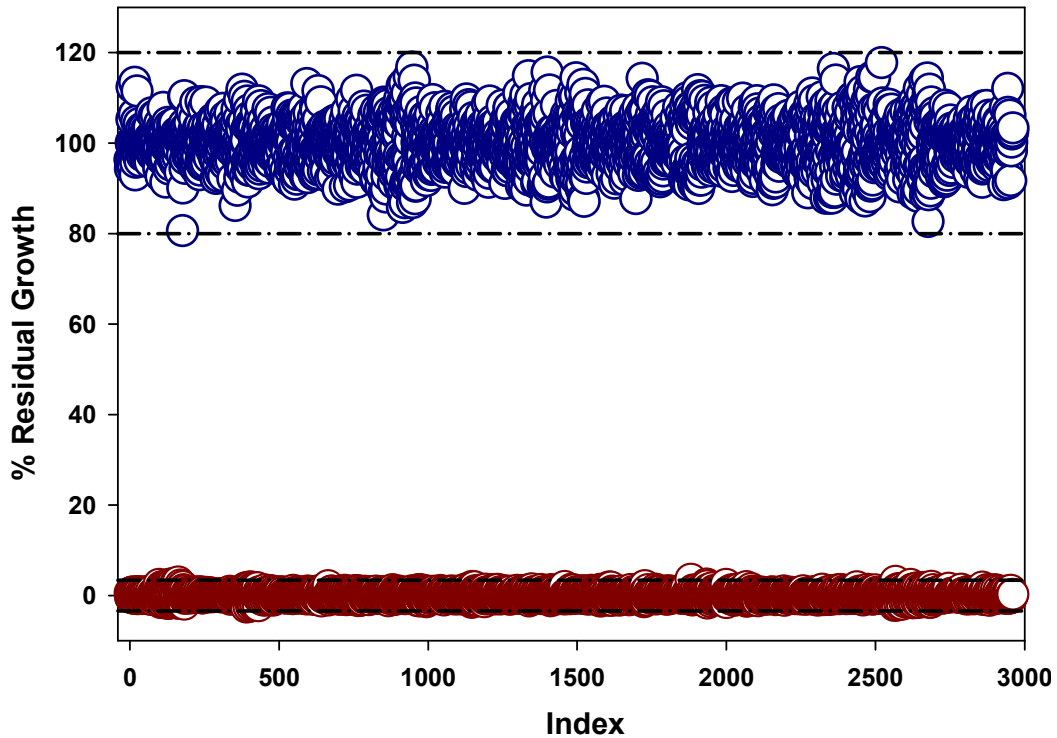

**Supplementary Fig. 2. Primary screen in M9 minimal media- Control Data**

The average high controls (100% residual growth; dark blue circles) and the average low controls (0% residual growth; maroon circles) containing 0.2% DMSO and 10  $\mu\text{g/ml}$  of norfloxacin, respectively ( $n=3$ ). The assay shows a large screening window between the high and the low controls and the calculated average Z' factor is 0.8.

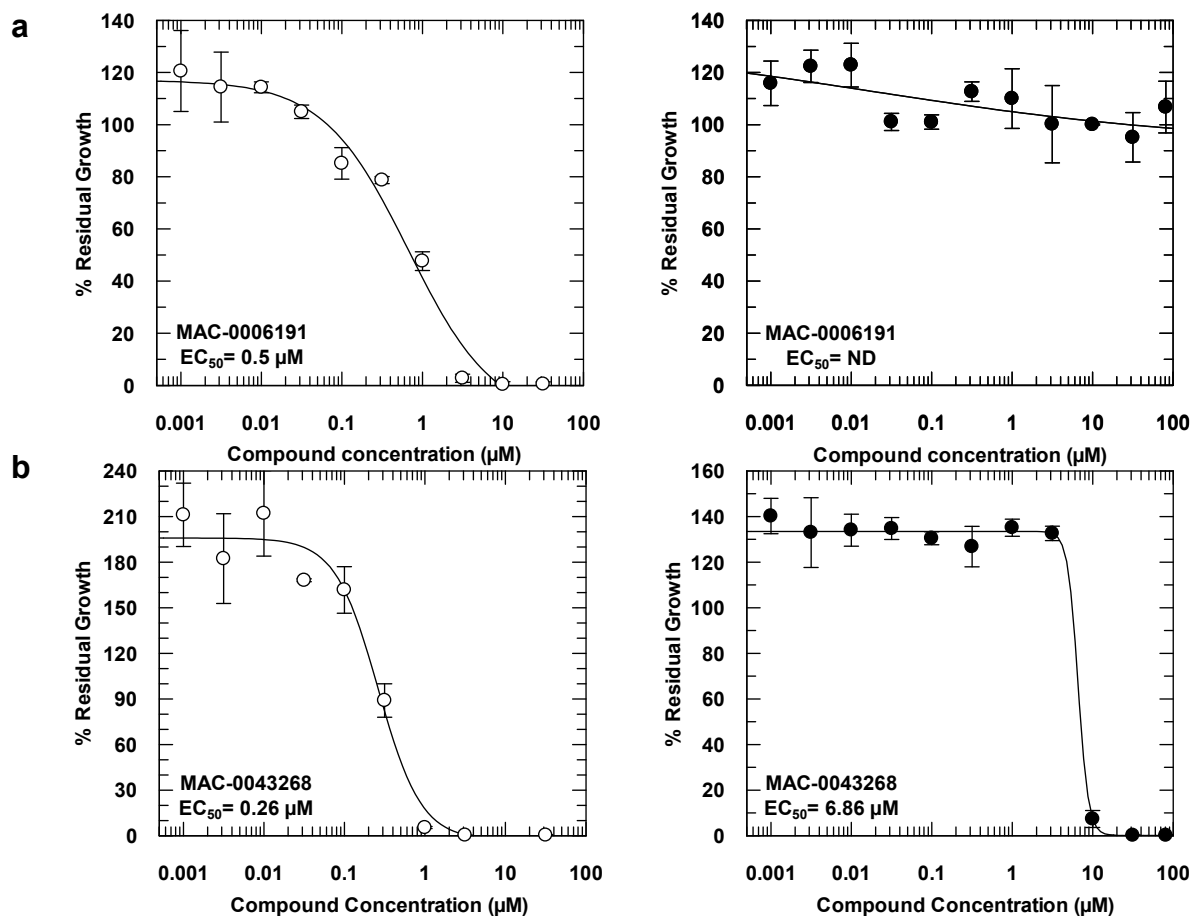

### Supplementary Fig. 3. Effect of media composition on the $\text{EC}_{50}$ of actives

Two representative examples of the  $\text{EC}_{50}$  analysis conducted on the actives prioritized from the primary screen. Dose response studies were carried out with each compound within a concentration range of 1 nM- 80  $\mu\text{M}$  against *E. coli* MG1655 grown in either M9 minimal (open circles) or supplemented minimal media (closed circles). In panel (a), MAC6191 has an  $\text{EC}_{50}$  of 0.5  $\mu\text{M}$  in minimal media but has no growth inhibitory activity when tested in supplemented minimal media. In panel (b), MAC43268 has  $\text{EC}_{50}$  values of 0.26 and 6.86  $\mu\text{M}$  when tested in minimal and supplemented minimal media, respectively. This results into a ~ 26-fold suppression in its biological activity. Data with the error bars represent the mean % residual growth  $\pm$  range of n=2 replicates.

|       |        |     |     |         |         |         |         |         |         |         |        |
|-------|--------|-----|-----|---------|---------|---------|---------|---------|---------|---------|--------|
| M9    | M9 ALL | AA  | VIT | NUC     | AA+VIT  | AA+NUC  | VIT+NUC | AA+VIT  | AA+NUC  | VIT+NUC | M9 ALL |
| D-Ala | L-Ala  | Gly | Glu | Ser     | Iso     | Leu     | Met     | Trp     | Arg     | Cys     | AA     |
| His   | Val    | Pro | Lys | Thr     | Asn     | Asp     | Phe     | Tyr     | Gln     | M9      | VIT    |
| A     | T      | G   | U   | Vit. B7 | Vit. B3 | Vit. B5 | Vit. B6 | Vit. B1 | Vit. B2 | PABA    | NUC    |

**Supplementary Fig. 4. The Metabolic Suppression Array**

For the secondary screen, key metabolites were systematically tested to look for suppression of the antibacterial activity of the prioritized actives. A 10<sup>3</sup>-fold dilution of a mid-exponential culture of *E. coli* MG1655 was set up in M9 minimal media in 96-well plates containing 4× the MIC (minimum inhibitory concentration) of each and a 1/20 dilution of the metabolic suppression array stock plate. The arrays were incubated O/N at 37 °C then growth was determined turbidometrically by measuring the optical density of the plates at 600 nm. Amino acids are referred to by their 3-letter code, nucleotides by their 1-letter code, PABA: *p*-aminobenzoic acid. M9: no supplements; ALL: minimal media with all supplements; AA: minimal media with all amino acids; VIT: minimal media with all vitamins; NUC: minimal media with all nucleobases. For media recipe, pool compositions and concentrations of supplements refer to the **Online methods** and **Supplementary Table 2**.

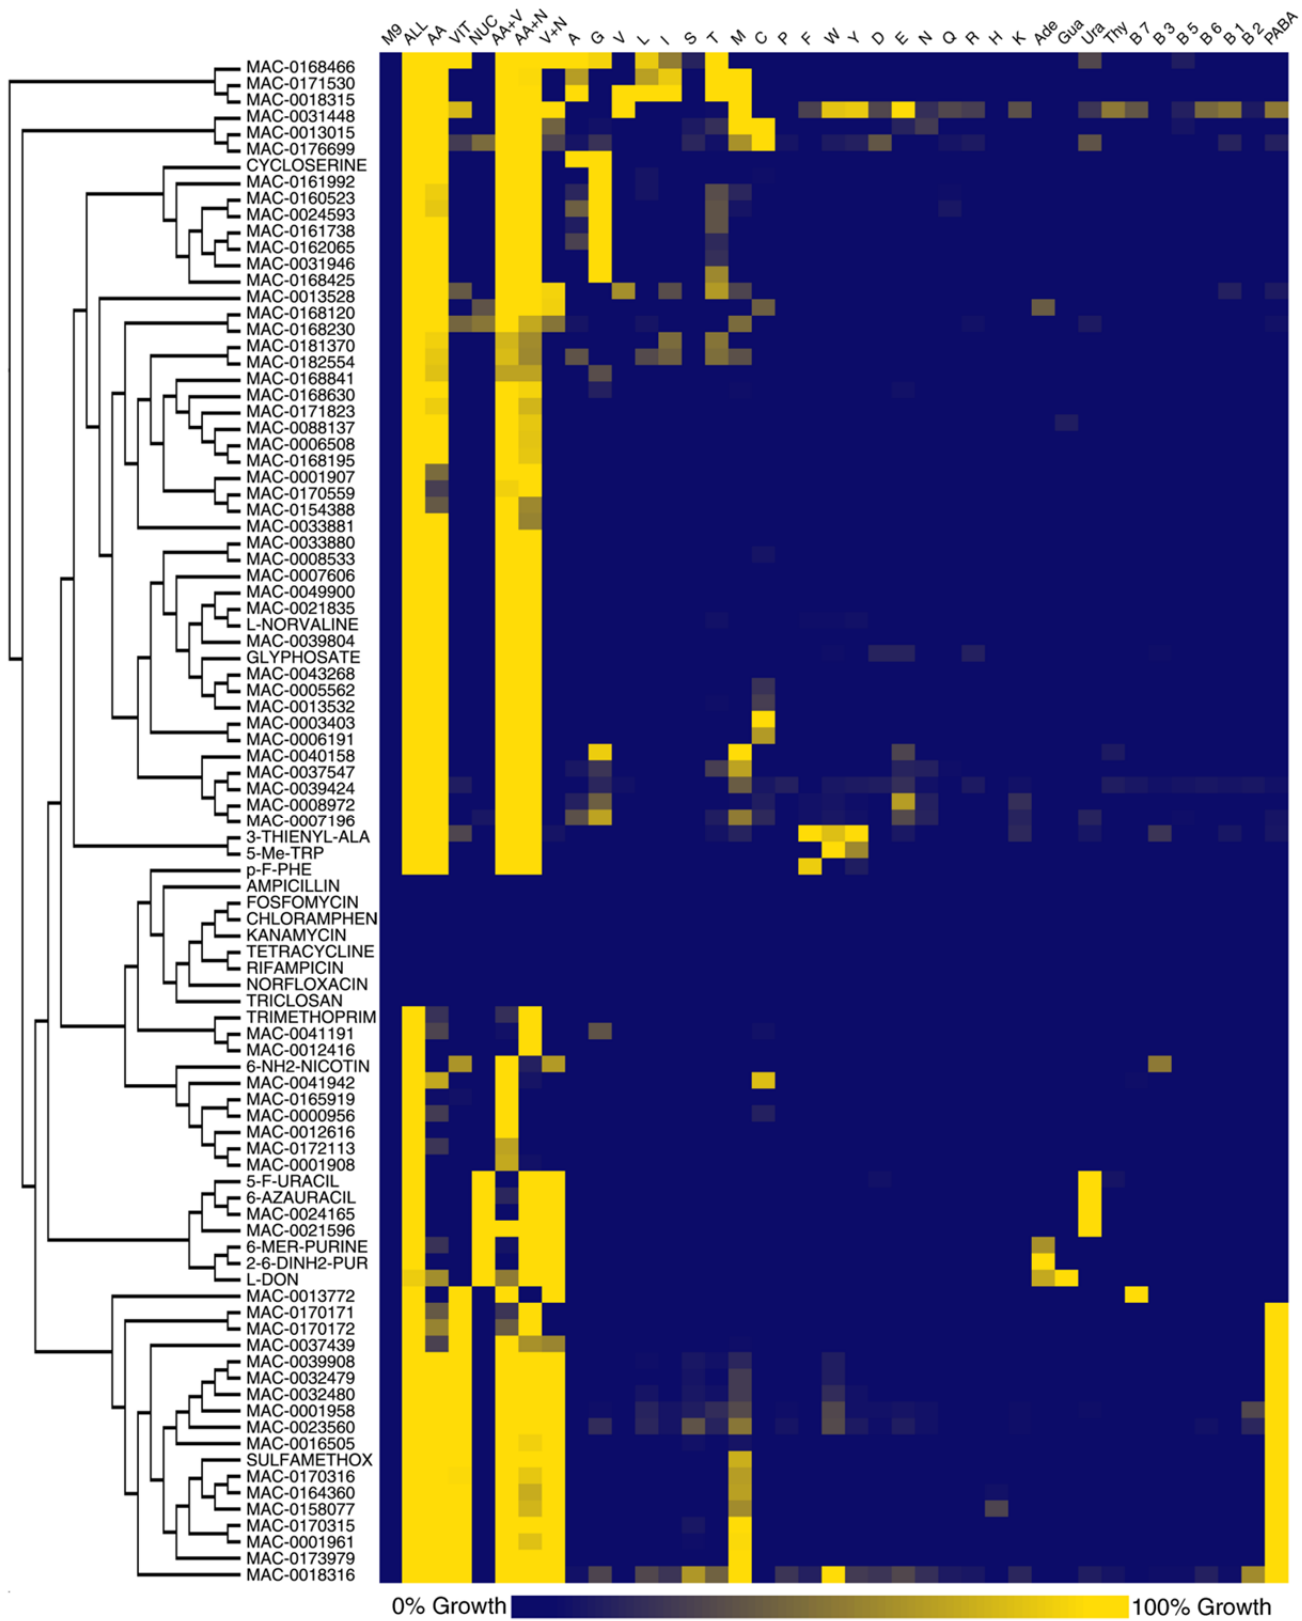

**Supplementary Fig. 5. Heat map of the metabolic suppression profiles of priority actives.**

Metabolic suppression profiles of 93 antibacterial inhibitors including 22 known antibiotics are hierarchically clustered based on the growth of *E. coli* MG1655 in the presence of each compound at 4× its MIC and with various primary metabolites or pools of metabolites in the metabolic suppression array (n= 2 replicates). Hierarchical cluster analysis of the percent residual growth was conducted as described in **Online methods**. Actives identified from the primary screen are designated by their MAC ID and known actives by their names. Amino acids are referred to by their 1-letter code, B vitamins by their respective numbers, PABA: *p*-aminobenzoic acid, Ade: adenine, Gua: guanine, Ura: uracil, Thy: thymine. M9: no supplements; ALL: minimal media with all supplements; AA: minimal media with all amino acids; VIT: minimal media with all vitamins; NUC: minimal media with all nucleobases; 3-THIENYL-ALA: L-3-thienylalanine, 5-Me-TRP: 5-methyltryptophan, p-F-PHE: p-fluorophenylalanine, CHLORAMPHEN: chloramphenicol, 6-NH<sub>2</sub>NICOTINAMIDE: 6-aminonicotinamide, 5-F-URACIL: 5-fluorouracil, 6-MER-PUR: 6-mercaptapurine (6-thiopurine), 2,6-DINH<sub>2</sub>-PUR: 2,6-diaminopurine, L-DON: 6-Diazo-5-oxo-L-norleucine, SULFAMETHOX: sulfamethoxazole.



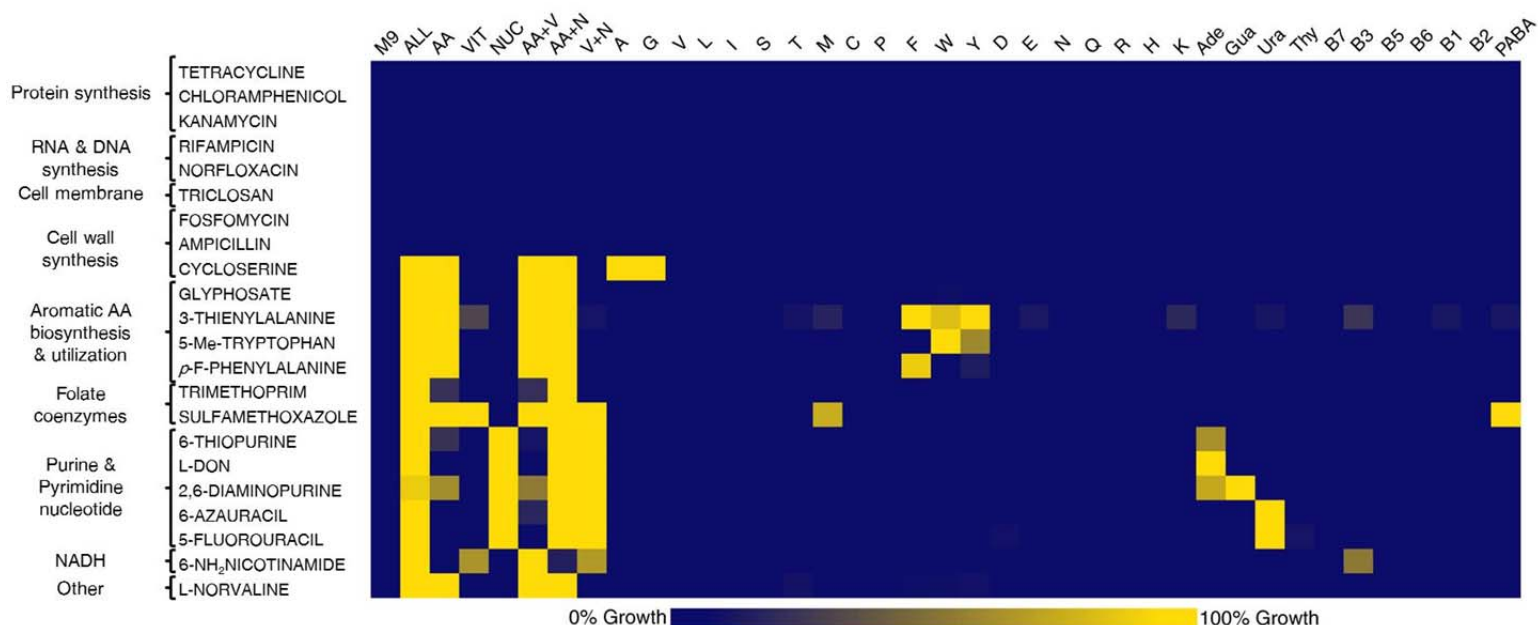

### Supplementary Fig. 6. Metabolic suppression profiles of known antibiotics

The metabolic suppression profiles of 22 known antibiotics evaluated against a panel of primary metabolites and pools of metabolites through the metabolic suppression array (**Supplementary Fig. 4**) are derived from the heat map in **Supplementary Fig. 5**. These antibiotics are grouped based on their general MOA class. Note that only inhibitors that impair biosynthetic capabilities are suppressed by metabolites or pools of metabolites. Amino acids are referred to by their 1-letter code, B vitamins by their respective numbers, PABA: *p*-aminobenzoic acid, Ade: adenine, Gua: guanine, Ura: uracil, Thy: thymine. M9: no supplements; ALL: minimal media with all supplements; AA: minimal media with all amino acids; VIT: minimal media with all vitamins; NUC: minimal media with all nucleobases; 5-Me-Tryptophan: 5-methyltryptophan, *p*-F-Phenylalanine: *p*-fluorophenylalanine, 6-NH<sub>2</sub>nicotinamide: 6-aminonicotinamide, L-DON: 6-Diazo-5-oxo-L-norleucine. Data represent the mean % residual growth of n=2 replicates.

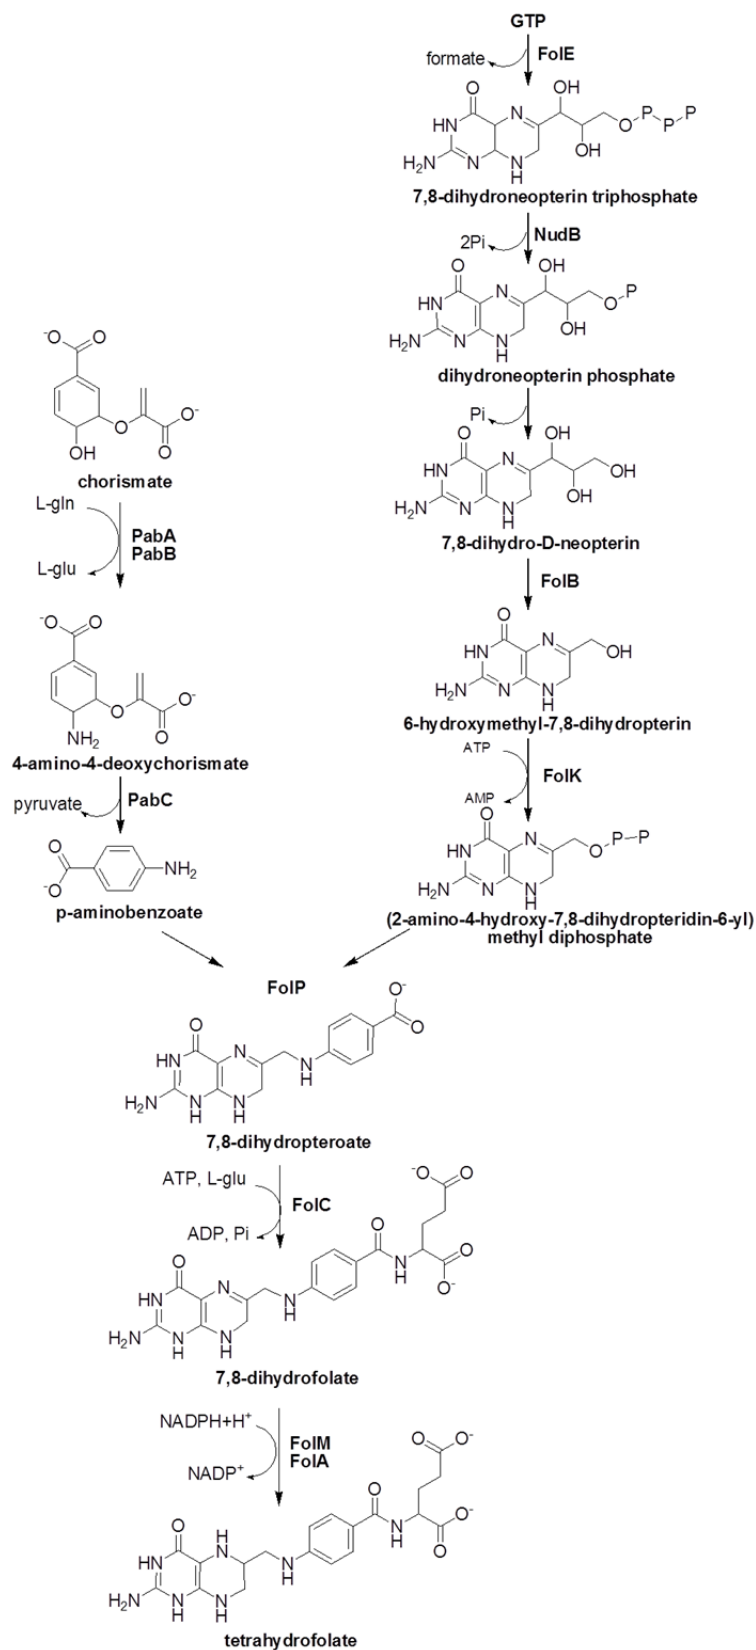

Supplementary Fig. 7. The tetrahydrofolate biosynthetic pathway in *E. coli*

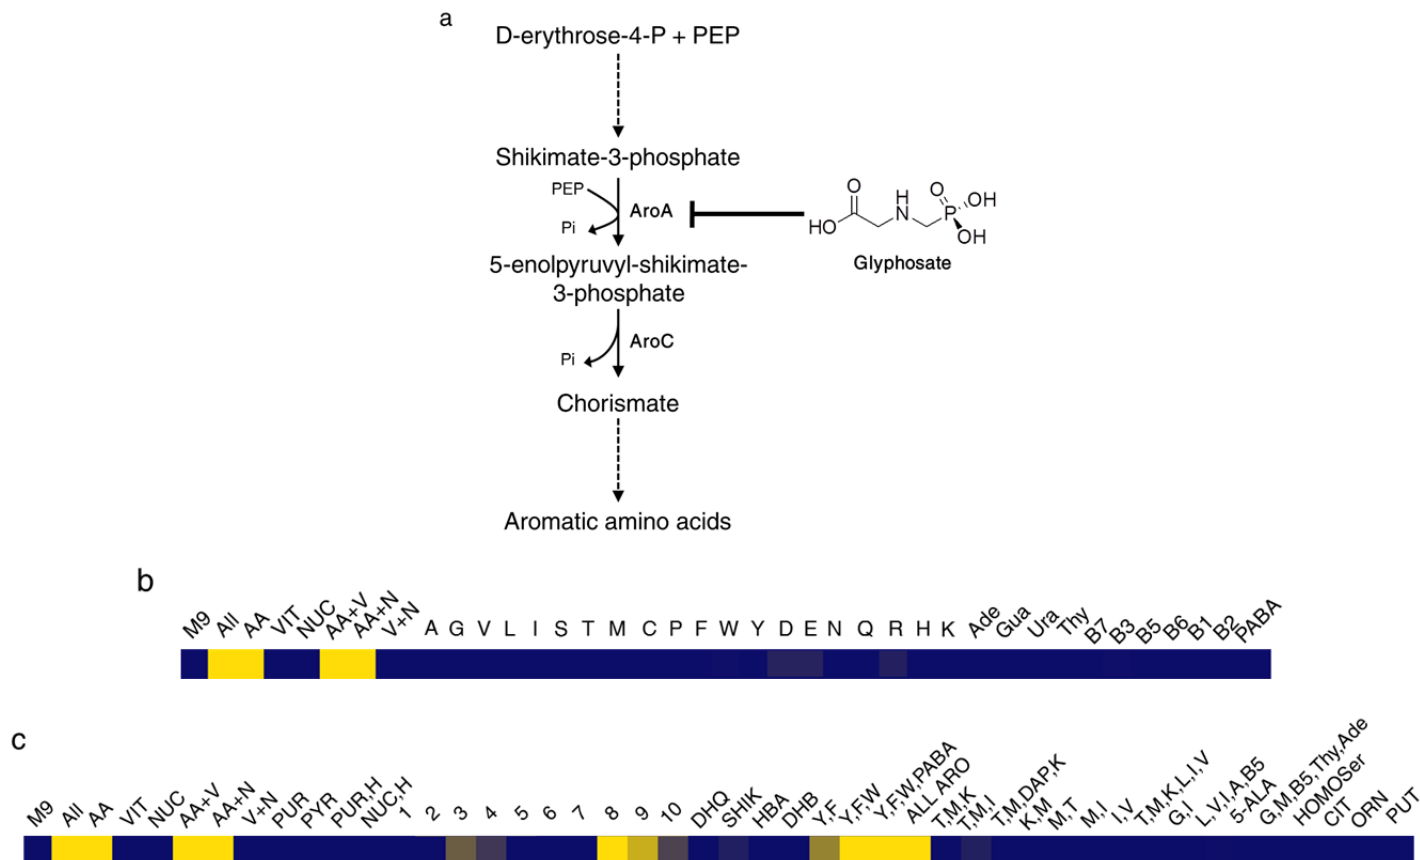

### Supplementary Fig. 8. Metabolic suppression profile of glyphosate

**(a)** Schematic diagram of the biosynthetic pathway of chorismate in *E. coli*. Chorismate is a precursor of several metabolites including aromatic amino acids. Glyphosate inhibits the step catalyzed by AroA. **(b)** The metabolic suppression profile of glyphosate against a panel of primary metabolites in the metabolic suppression array (**Supplementary Fig. 4**) is extracted from the heat map in **Supplementary Fig. 5**. **(c)** The metabolic suppression profile of glyphosate against additional pools of metabolites in the expanded metabolic suppression array (**Fig. 3a**). The legend is the same as that for **Fig. 3**. Note the full suppression of the activity of glyphosate by pools containing the three aromatic amino acids.

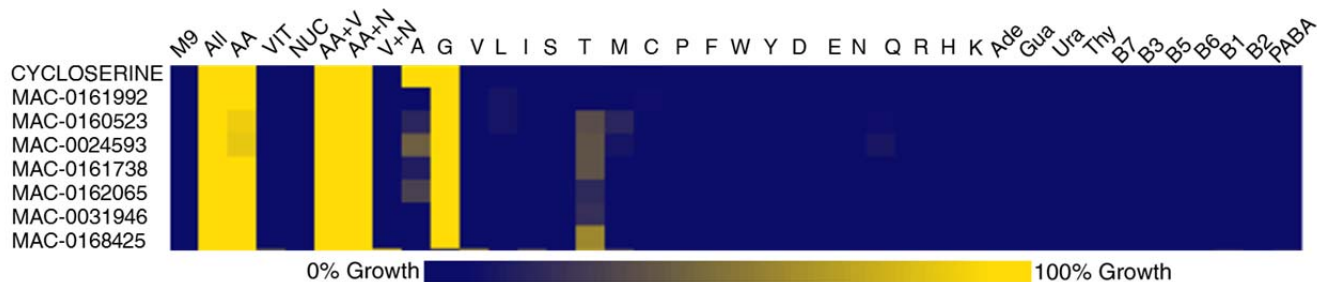

### Supplementary Fig. 9. Cluster of actives suppressed by glycine

Cluster from the heat map in **Supplementary Fig. 5** showing the metabolic suppression profiles of 8 inhibitors (including the known antibiotic cycloserine) evaluated against a panel of primary metabolites and pools of metabolites through the metabolic suppression array (**Supplementary Fig. 4**). In this cluster, the activity of all of the compounds is fully suppressed by the amino acid glycine and to varying degrees by the amino acid, L-threonine. Amino acids are referred to by their 1-letter code, B vitamins by their respective numbers, PABA: *p*-aminobenzoic acid, Ade: adenine, Gua: guanine, Ura: uracil, Thy: thymine. M9: no supplements; ALL: minimal media with all supplements; AA: minimal media with all amino acids; VIT: minimal media with all vitamins; NUC: minimal media with all nucleobases. Data represent the mean % residual growth of n=2 replicates.

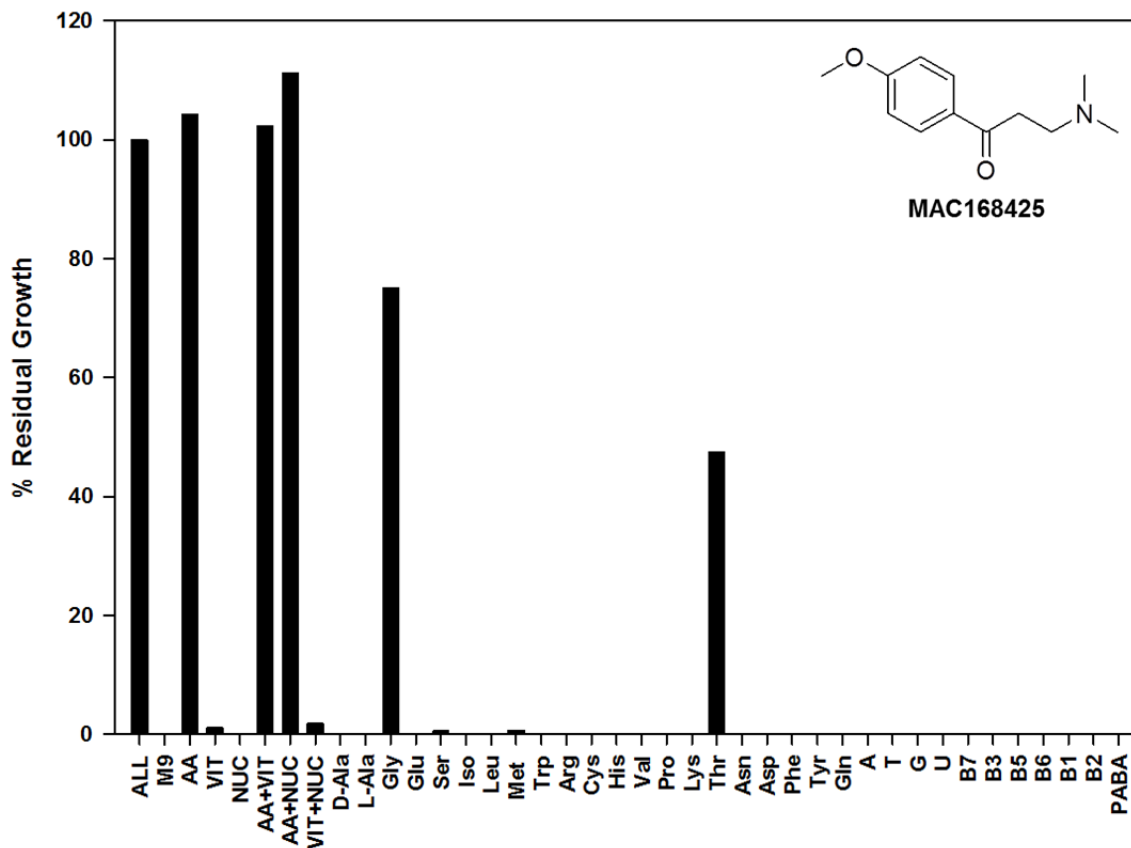

### Supplementary Fig. 10. Metabolic suppression profile of MAC168425

A bar graph representation of the metabolic suppression of the activity of MAC168425 by a panel of primary metabolites and pools of metabolites in the metabolic suppression array (**Supplementary Fig. 4**). Note the high suppression of the inhibitory activity of this bioactive by glycine and to a lesser extent by L-threonine as well as pools containing a mixture of amino acids. Amino acids are referred to by their 3-letter code, nucleotides by their 1-letter code, PABA: *p*-aminobenzoic acid. M9: no supplements; ALL: minimal media with all supplements; AA: minimal media with all amino acids; VIT: minimal media with all vitamins; NUC: minimal media with all nucleobases. **Inset:** Chemical structure of MAC168425. Data are representative of at least two independent experiments.

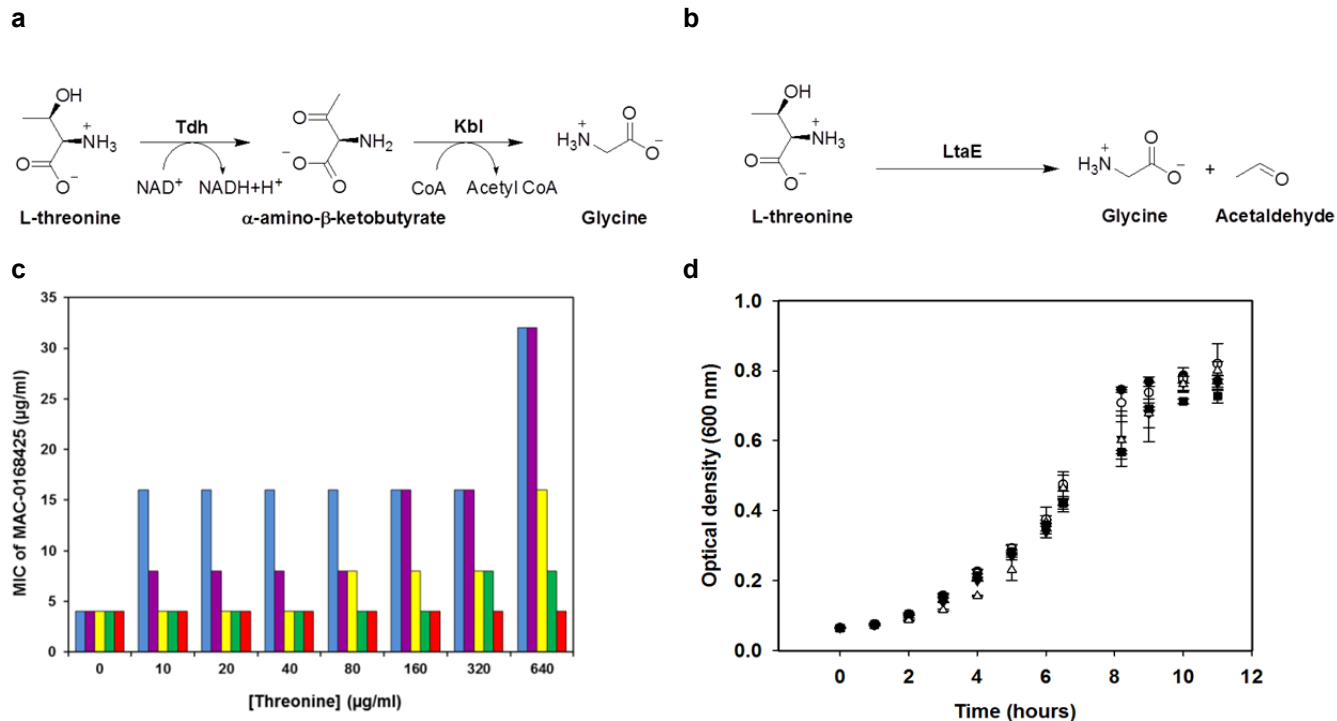

**Supplementary Fig. 11. L-threonine suppresses MAC168425 through its conversion into glycine**

(a) and (b) Pathways for the conversion of L-threonine into glycine in *E. coli*. In the major pathway (a) threonine dehydrogenase (Tdh) oxidizes L-threonine to  $\alpha$ -amino- $\beta$ -ketobutyrate which is cleaved by  $\alpha$ -amino- $\beta$ -ketobutyrate lyase (Kbl) to form glycine and acetyl CoA<sup>3</sup>. In the minor pathway (b) threonine is degraded by low-specificity threonine aldolase (LtaE) to form glycine and acetaldehyde<sup>3</sup>. (c) The MIC of MAC168425 increases in the presence of increasing concentrations of L-threonine. This effect is abolished in deletion mutants in the pathways that convert L-threonine to glycine. The parent strain *E. coli* BW25113 (blue bar),  $\Delta$ *ltaE* (purple bar),  $\Delta$ *tdh* (yellow bar),  $\Delta$ *ltaE*  $\Delta$ *tdh* (green bar),  $\Delta$ *ltaE*  $\Delta$ *tdh*  $\Delta$ *kbl* (red bar). (d) Growth curves of the parent strain (closed circles),  $\Delta$ *tdh* (open circles),  $\Delta$ *ltaE* (closed triangles),  $\Delta$ *ltaE*  $\Delta$ *tdh* (open triangles),  $\Delta$ *ltaE*  $\Delta$ *tdh*  $\Delta$ *kbl* (closed squares) in 96-well plates in glucose minimal media. Data and error bars represent mean values  $\pm$  s.d of 4 biological replicates.

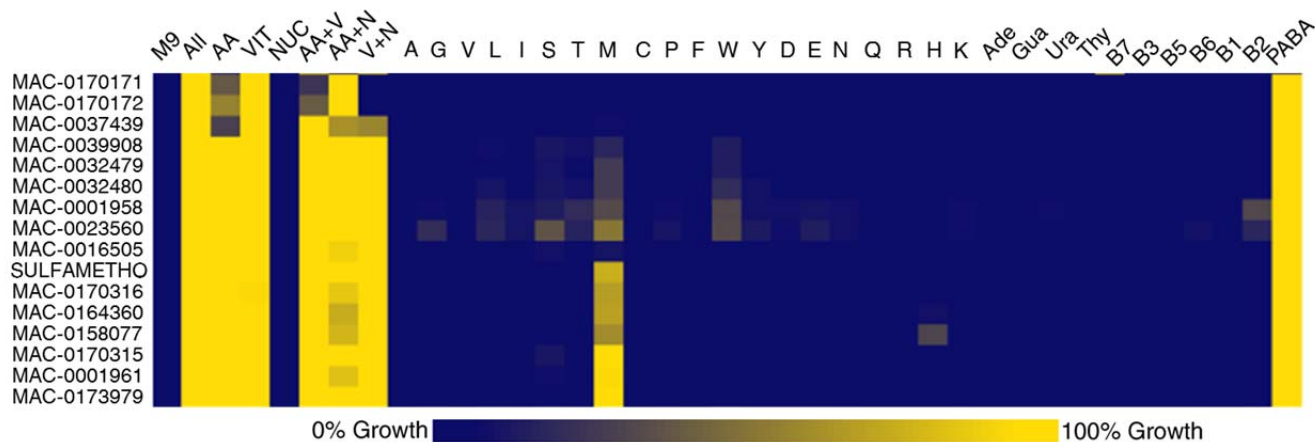

### Supplementary Fig. 12. Cluster of actives suppressed by PABA

Cluster from the heat map in **Supplementary Fig. 5** showing the metabolic suppression profiles of 16 actives (including that of the known antibiotic sulfamethoxazole) evaluated against a panel of primary metabolites and pools of metabolites through the metabolic suppression array (**Supplementary Fig. 4**). In this cluster, the activity of all of the compounds was fully suppressed by the folate biosynthesis intermediate, *p*-aminobenzoic acid (PABA) and to varying degrees by the amino acid, L-methionine. Amino acids are referred to by their 1-letter code, B vitamins by their respective numbers, PABA: *p*-aminobenzoic acid, Ade: adenine, Gua: guanine, Ura: uracil, Thy: thymine. M9: no supplements; ALL: minimal media with all supplements; AA: minimal media with all amino acids; VIT: minimal media with all vitamins; NUC: minimal media with all nucleobases. Data represent the mean % residual growth of n=2 replicates.

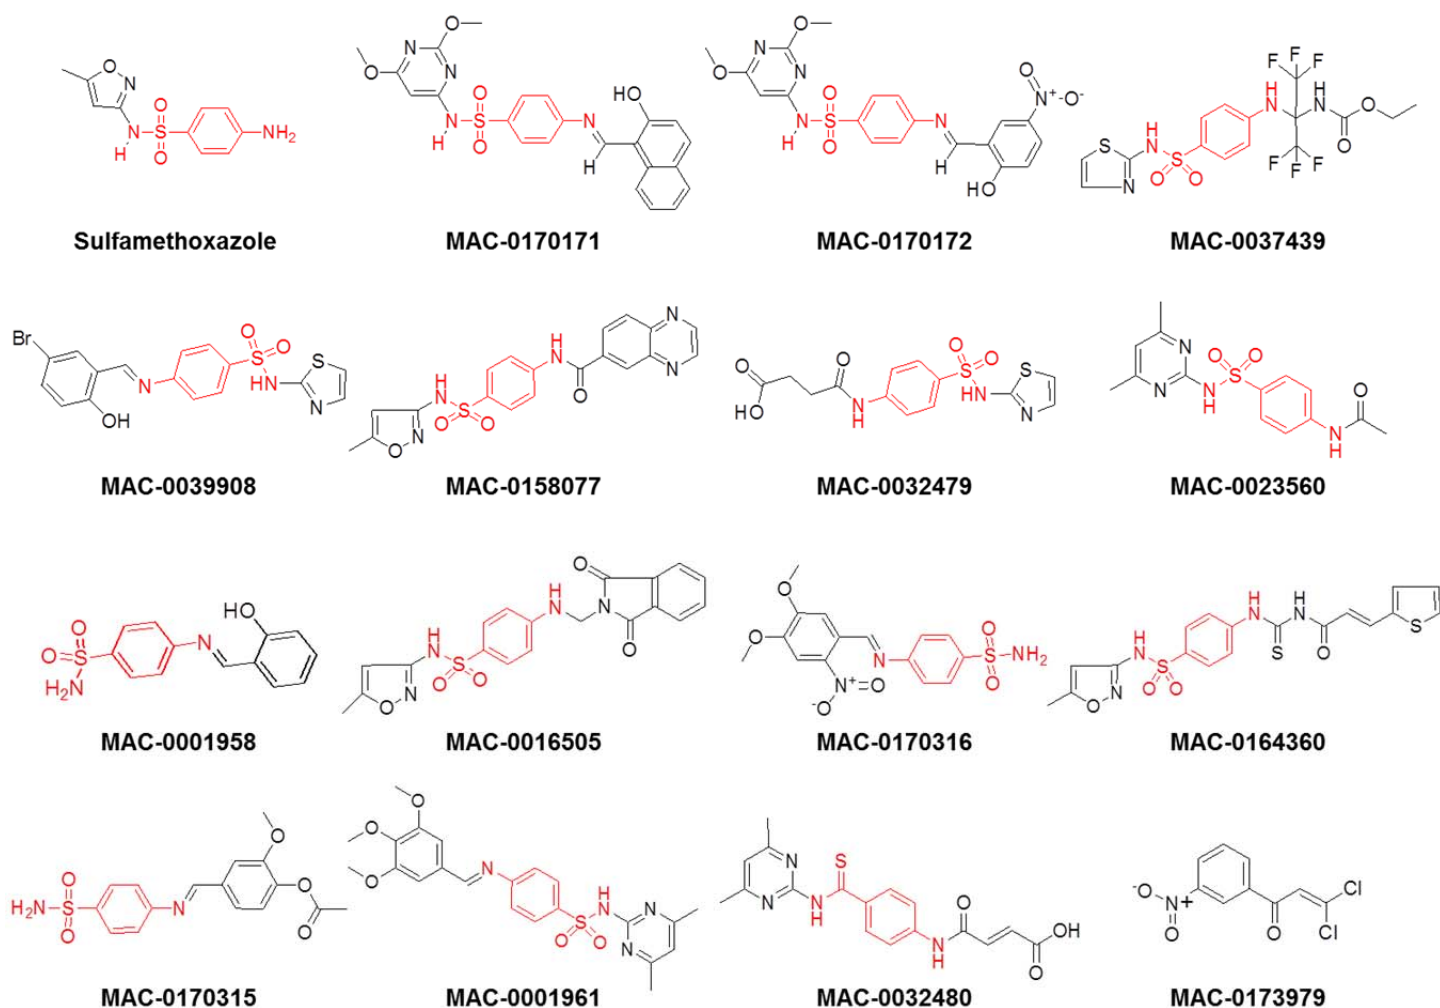

### Supplementary Fig. 13. Structures of compounds suppressed by PABA

Chemical structures of the compounds in the cluster suppressed by PABA in the heat map in **Supplementary Fig. 5** and **Supplementary Fig. 12**. Note that the majority of the compounds in the cluster with the exception of MAC173979 contain the p-aminobenzenesulfonamide pharmacophore and are structural analogs of the known antibiotic sulfamethoxazole.



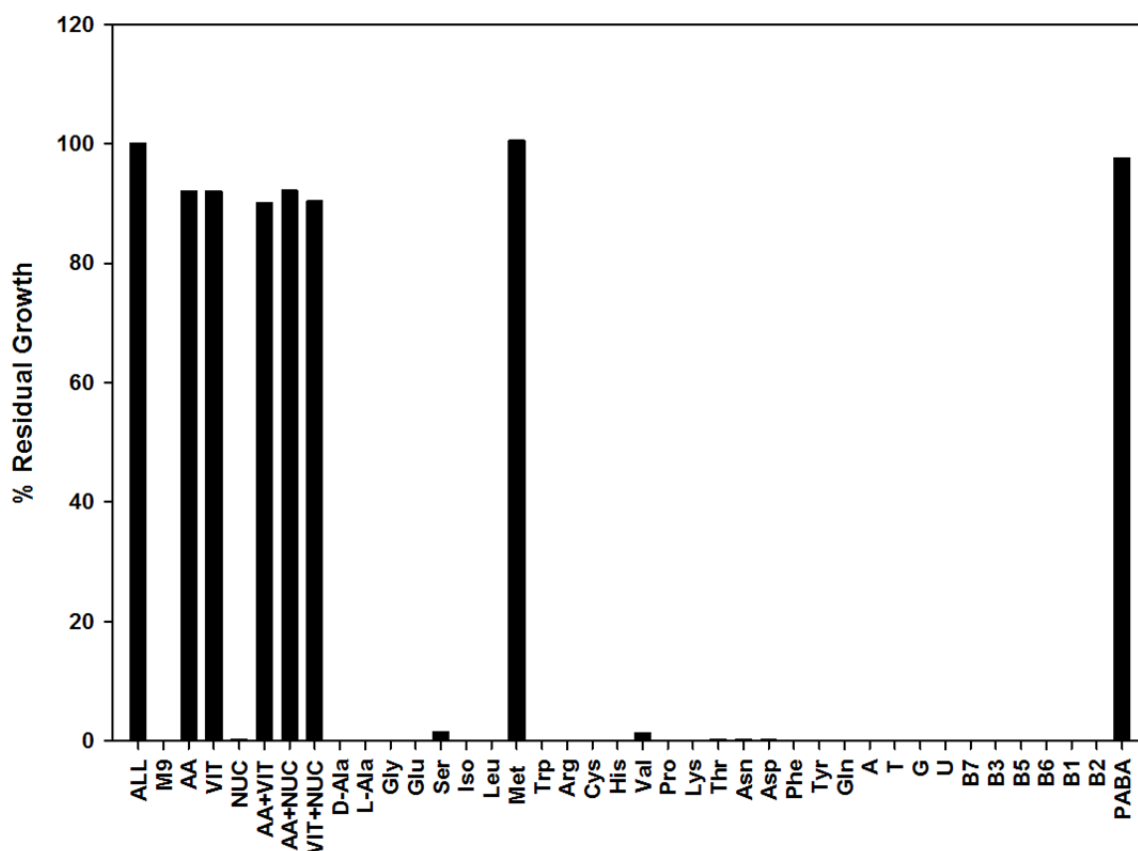

**Supplementary Fig. 14. Metabolic suppression profile of MAC173979**

A bar graph representation of the metabolic suppression of the activity of MAC173979 by a panel of primary metabolites and pools of metabolites in the metabolic suppression array (**Supplementary Fig. 4**). Note the complete suppression of the inhibitory activity of this bioactive by methionine and *p*-aminobenzoic acid as well as pools containing either or both metabolites. Amino acids are referred to by their 3-letter code, nucleotides by their 1-letter code, PABA: *p*-aminobenzoic acid. M9: no supplements; ALL: minimal media with all supplements; AA: minimal media with all amino acids; VIT: minimal media with all vitamins; NUC: minimal media with all nucleobases. Data are representative of at least two independent experiments.

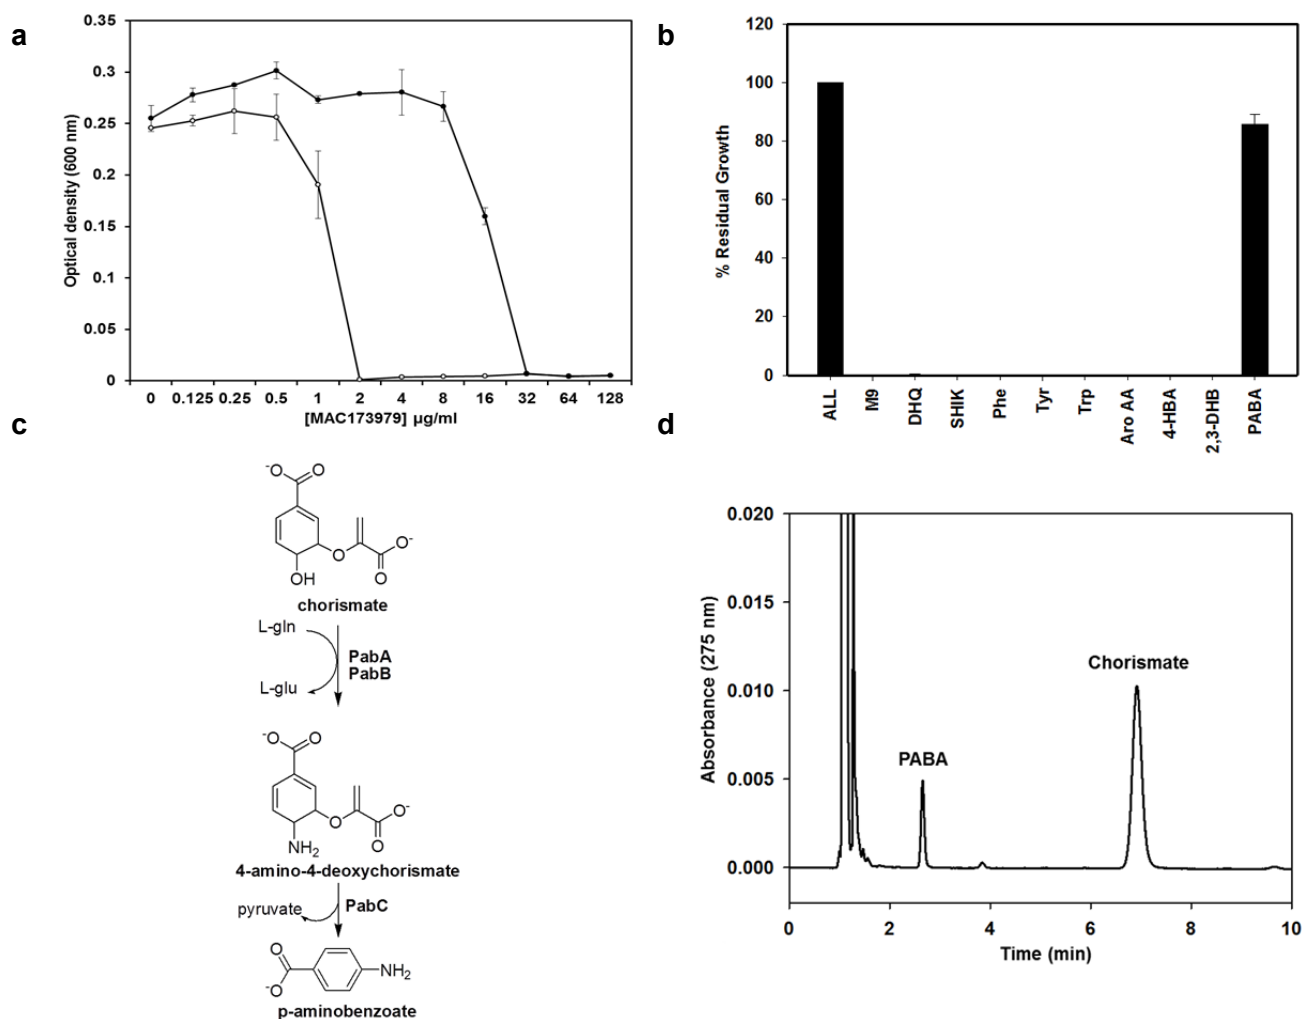

**Supplementary Fig. 15. Suppression of MAC173979 and assay for PABA synthesis**

**(a)** PABA suppresses up to 16-fold the activity of MAC173979 against *E. coli*. The MIC of the inhibitor was determined in minimal media in the absence (open circles) or presence (closed circles) of PABA (2  $\mu\text{g/ml}$ ). Data with the error bars represent the mean values  $\pm$  range of  $n=2$  biological replicates. **(b)** The activity of MAC173979 is not suppressed by precursors or products of chorismate other than PABA. Data with the error bars represent the mean % residual growth  $\pm$  range of  $n=2$  replicates. The legend is the same as that for **Fig. 3** **(c)** PABA biosynthetic pathway in *E. coli*. **(d)** UV trace of a mixture containing standards of PABA and chorismate separated on a  $\text{C}_{18}$  reverse phase column and eluted isocratically with 5% acetic acid in double distilled  $\text{H}_2\text{O}^4$ .

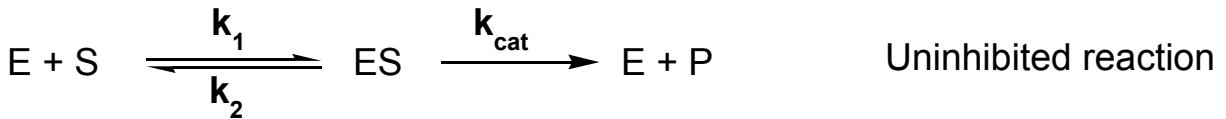

**a**

Simple reversible time dependent inhibition

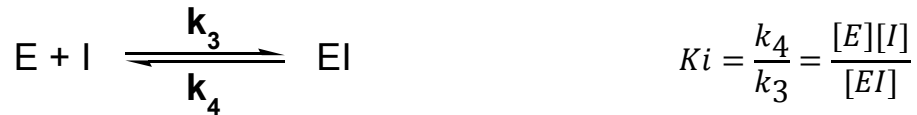

**b**

Two-step time dependent inhibition

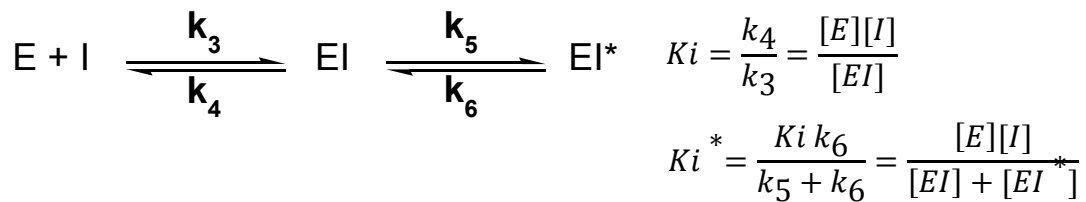

### Supplementary Fig. 16. Schemes for time-dependent inhibition

Time-dependent inhibitors of enzyme activities can follow one of two kinetic schemes. In the case of simple reversible inhibition (**a**), formation of the EI complex is a single step event that occurs on a slow time scale relative to the rate of catalysis and is in equilibrium with its dissociation. In a second scheme (**b**), binding of the inhibitor to the enzyme occurs rapidly then through a second slower step the EI complex undergoes a conformational change to form the inactive EI\* complex. In the case where  $k_6$  is extremely low that it approaches zero, the inhibition is essentially irreversible<sup>1,2</sup>.

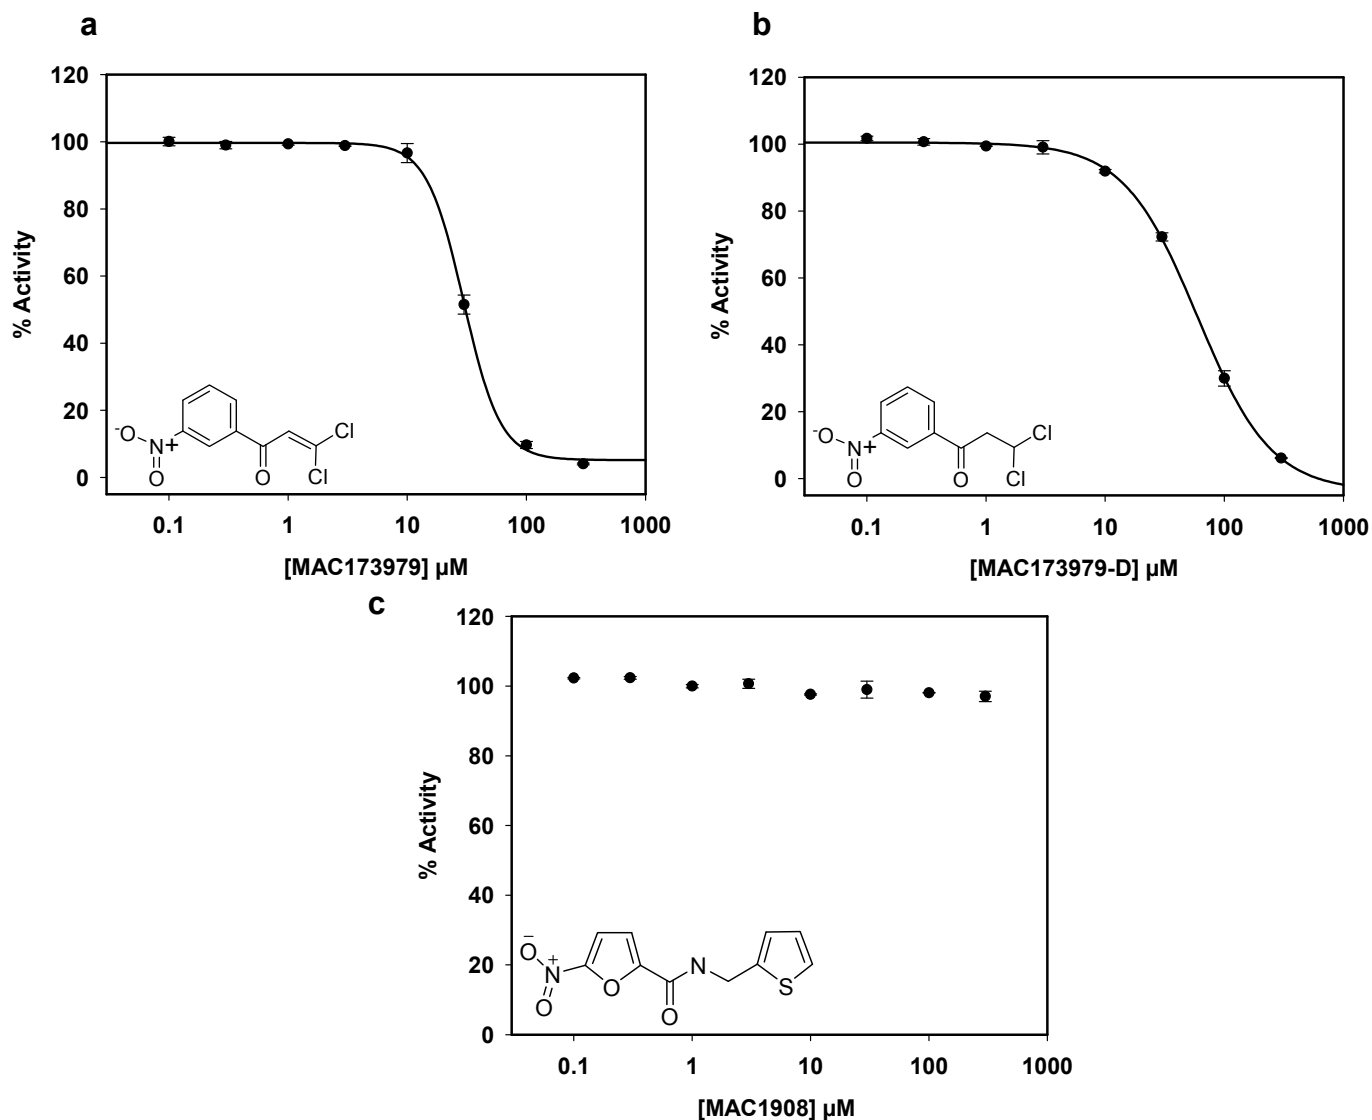

### Supplementary Fig. 17. Dose-response determinations against PabA-B-C

Dose-response curves of MAC173979 (**a**) and an analog lacking the Michael acceptor, MAC173979-D (**b**). As a negative control, an inhibitor not suppressed by PABA, MAC1908, was also tested (**c**). Structures are shown as insets. Inhibitors (0-1000  $\mu\text{M}$ ) were incubated with the enzymes for 30 minutes prior to substrates addition. Reactions were quenched after 30 minutes with 8 M urea and analyzed by HPLC. Data with the error bars represent the mean % activity  $\pm$  range of  $n=2$  replicates and the dose response curves were fitted to the four parameter logistic nonlinear regression curve yielding  $\text{IC}_{50}$  values of  $30 \pm 2 \mu\text{M}$  (**a**),  $60 \pm 7 \mu\text{M}$  (**b**) and no inhibition for (**c**).

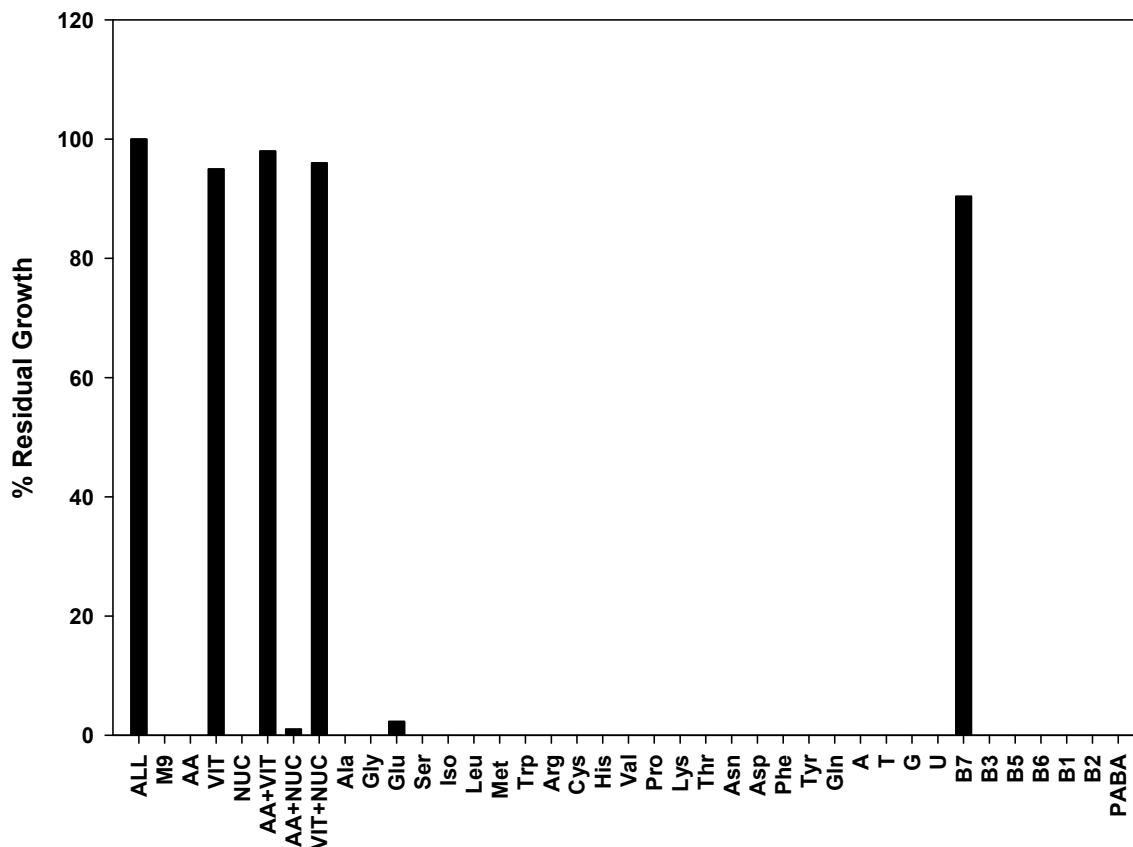

**Supplementary Fig. 18. Metabolic suppression profile of MAC13772**

A bar graph representation of the metabolic suppression of the activity of MAC13772 by a panel of primary metabolites and pools of metabolites in the metabolic suppression array (**Supplementary Fig. 4**). Note the complete suppression of the inhibitory activity of this bioactive by biotin (vit.B7) as well as pools containing vitamins. Amino acids are referred to by their 3-letter code, nucleotides by their 1-letter code, PABA: *p*-aminobenzoic acid. M9: no supplements; ALL: minimal media with all supplements; AA: minimal media with all amino acids; VIT: minimal media with all vitamins; NUC: minimal media with all nucleobases. Data are representative of at least two independent experiments.

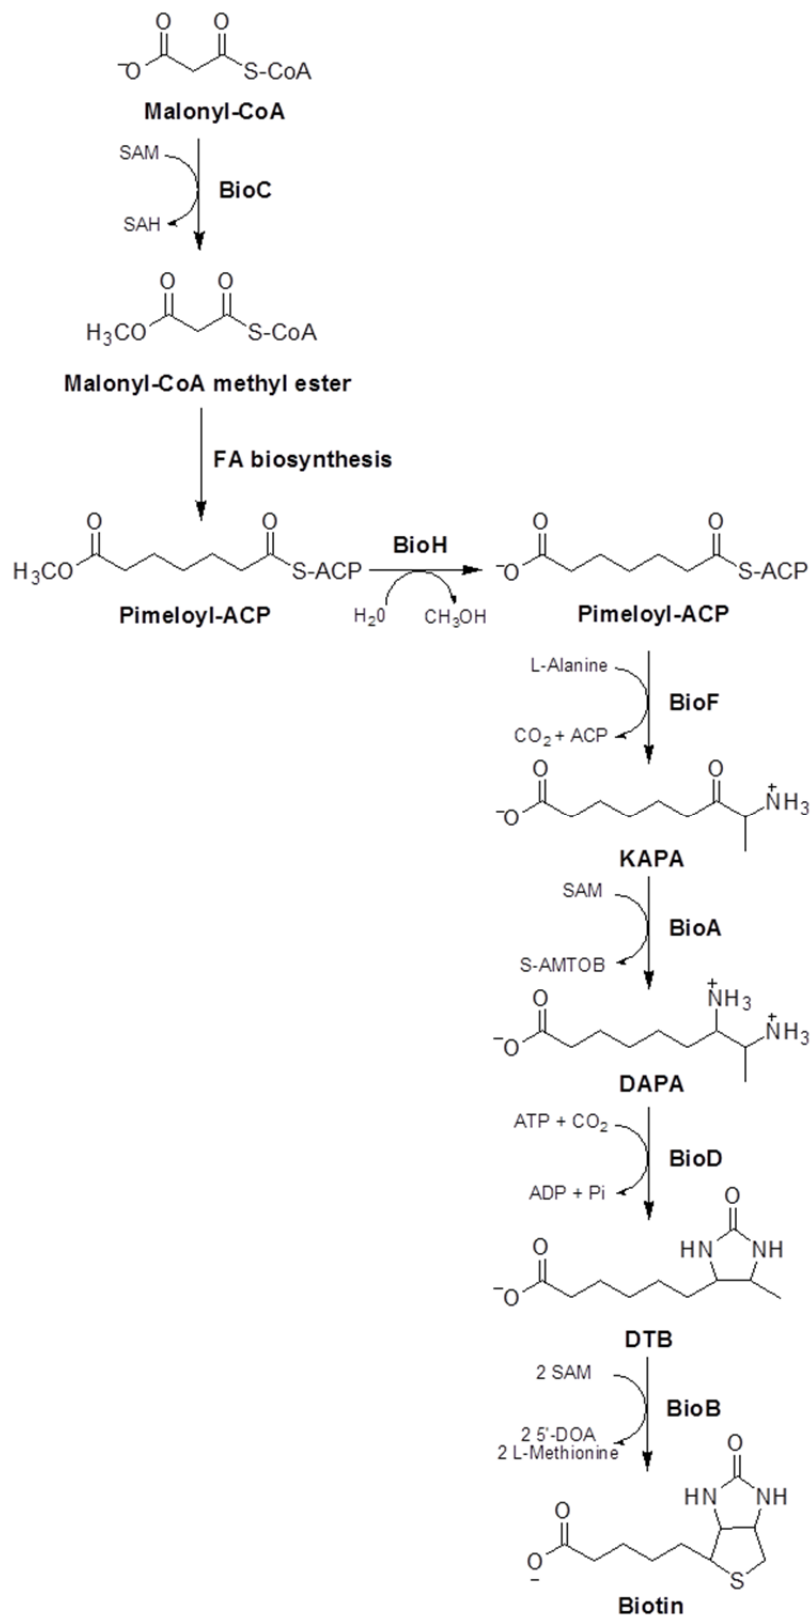

**Supplementary Fig. 19. Biotin biosynthesis in *E. coli***

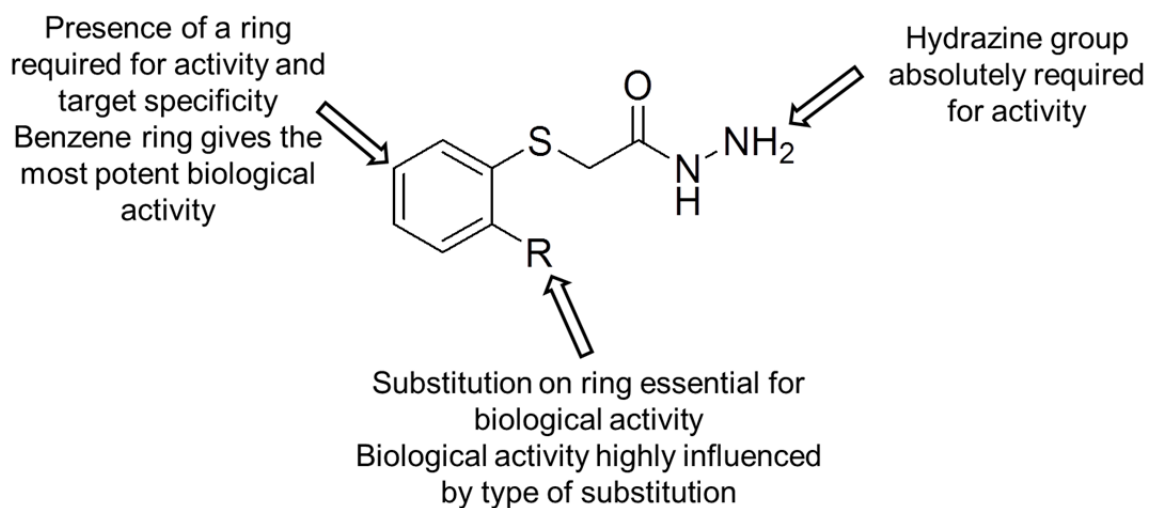

**Supplementary Fig. 20. Summary of structure-activity relationship investigation of MAC13772 and analogs**

This schematic summarizes the main findings from the SAR study into the biological and biochemical activity of MAC13772 and 24 analogs (see **Table 1, Supplementary Table 5**).

### 3. SUPPLEMENTARY NOTES

#### CHEMICAL CHARACTERIZATION OF COMPOUNDS USED IN THIS STUDY

##### *3-(dimethylamino)-1-(4-methoxyphenyl)propan-1-one (MAC168425)*

<sup>1</sup>H NMR (700 MHz, DMSO-*d*<sub>6</sub>): δ ppm 8.01 (2 H, d, J=8.95 Hz), 7.13 (2 H, d, J=8.96 Hz), 3.90 (1 H, s), 3.60 (2 H, t, J=7.14, 0.95 Hz), 3.41 (2 H, t, J=7.56 Hz), 2.82 (6 H, s); <sup>13</sup>C NMR (176 MHz, DMSO-*d*<sub>6</sub>): δ ppm 195.55, 163.99, 130.87, 129.36, 114.47, 56.11, 52.37, 42.66, 33.19. HRMS: for C<sub>12</sub>H<sub>18</sub>NO<sub>2</sub> [M+1]<sup>+</sup>, calcd.: 208.1338, obs.: 208.1330.

##### *3,3-dichloro-1-(3-nitrophenyl)prop-2-en-1-one (MAC173979)*

<sup>1</sup>H NMR (600 MHz, DMSO-*d*<sub>6</sub>): δ ppm 8.70 (1 H, dd, J=2.3, 1.8 Hz), 8.51 (1 H, dd, J=8.2, 1.0 Hz), 8.44 (1 H, d, J=7.7 Hz), 8.04 (1 H, s), 7.86 (1 H, d, J=0.5); <sup>13</sup>C NMR (150.92 MHz, DMSO-*d*<sub>6</sub>): δ ppm 184.68, 148.16, 137.60, 134.69, 134.64, 130.75, 128.02, 124.77, 122.91. HRMS: for C<sub>9</sub>H<sub>5</sub>Cl<sub>2</sub>NO<sub>3</sub> [M], calcd.: 244.9668, obs.: 244.9668.

##### *3,3-dichloro-1-(3-nitrophenyl)propan-1-one: analog of MAC173979 without the Michael acceptor (MAC173979-D) (purchased from Ambinter- France)*

<sup>1</sup>H NMR (700 MHz, DMSO-*d*<sub>6</sub>): δ ppm 8.69 (1 H, t, J=1.83 Hz), 8.51 (1 H, ddd, J=8.14, 2.36, 1.06 Hz), 8.45 (1 H, dq, J=7.75, 0.95 Hz), 7.86 (1 H, t, J=8.09 Hz), 6.61 (1 H, t, J=6.07 Hz), 4.32 (2 H, d, J=6.17 Hz); <sup>13</sup>C NMR (176 MHz, DMSO-*d*<sub>6</sub>): δ ppm 193.02, 148.09, 136.69, 134.42, 130.71, 128.00, 122.57, 69.18, 51.26. HRMS: for C<sub>9</sub>H<sub>7</sub>Cl<sub>2</sub>NO<sub>3</sub> [M], calcd.: 246.9803, obs.: 246.9800.

##### *2-(2-nitrophenylthio)acetohydrazide (Table 1, Compound MAC13772)*

<sup>1</sup>H-NMR (700 MHz, DMSO-*d*<sub>6</sub>): δ ppm 9.40 (1 H, br. s.), 8.17 - 8.22 (1 H, m), 7.68 - 7.74 (2 H, m), 7.41 (1 H, ddd, J=8.30, 5.76, 2.69 Hz), 4.32 (2 H, s), 3.77 (2 H, s). <sup>13</sup>C-NMR



(176 MHz, DMSO- $d_6$ ):  $\delta$  ppm 166.48, 145.40, 136.28, 134.23, 127.53, 125.81, 125.51, 34.06. HRMS: for C<sub>8</sub>H<sub>10</sub>N<sub>3</sub>O<sub>3</sub>S [M+1]<sup>+</sup>, calcd.: 228.0443, obs.: 228.0439.

*2-(3-nitrophenylthio)acetohydrazide (Table 1, Compound 5)*

<sup>1</sup>H-NMR (700 MHz, DMSO- $d_6$ ):  $\delta$  ppm 9.20 (1 H, s), 7.36 - 7.39 (1 H, m), 7.32 - 7.34 (1 H, m), 6.98 (1 H, dd,  $J=8.08, 2.09$  Hz), 6.67 (1 H, t,  $J=6.13$  Hz), 4.26 (2 H, s), 3.73 (2 H, d,  $J=6.28$  Hz); <sup>13</sup>C-NMR (176 MHz, DMSO- $d_6$ ):  $\delta$  ppm 168.63, 149.53, 148.72, 129.83, 118.66, 110.33, 105.48, 44.67.

*2-(4-nitrophenylthio)acetohydrazide (Table 1, Compound 6)*

<sup>1</sup>H-NMR (700 MHz, DMSO- $d_6$ ):  $\delta$  ppm 11.59 (1 H, br. s.), 8.15 (2 H, m,  $J=8.98$  Hz), 7.60 (2 H, m,  $J=8.98$  Hz), 4.08 (2 H, s), 3.56 (2 H, s); <sup>13</sup>C-NMR (176 MHz, DMSO- $d_6$ ):  $\delta$  ppm 166.94, 126.66, 123.86, 66.35, 32.43; HRMS: for C<sub>8</sub>H<sub>10</sub>N<sub>3</sub>O<sub>3</sub>S [M+1]<sup>+</sup>, calcd.: 228.0443, obs.: 228.0453.

*2-(phenylthio)acetohydrazide (Table 1, Compound 7)*

<sup>1</sup>H-NMR (700 MHz, DMSO- $d_6$ ):  $\delta$  ppm 9.24 (1 H, br. s.), 7.33 - 7.38 (2 H, m), 7.28 - 7.33 (2 H, m), 7.16 - 7.21 (1 H, m), 4.28 (2 H, br. s.), 3.59 (2 H, s); <sup>13</sup>C-NMR (176 MHz, DMSO- $d_6$ ):  $\delta$  ppm 167.23, 136.16, 128.94, 127.79, 125.78, 34.59; HRMS: for C<sub>8</sub>H<sub>11</sub>N<sub>2</sub>O<sub>2</sub>S [M+1]<sup>+</sup>, calcd.: 183.0592, obs.: 183.0589.

*2-(2-fluorophenylthio)acetohydrazide (Table 1, Compound 8)*

<sup>1</sup>H-NMR (700 MHz, DMSO- $d_6$ ):  $\delta$  ppm 9.26 (1 H, br. s.), 7.48 (1 H, td,  $J=7.85, 1.65$  Hz), 7.24 - 7.31 (1 H, m), 7.16 - 7.24 (2 H, m), 4.28 (2 H, s), 3.60 (2 H, s); <sup>13</sup>C-NMR (176 MHz, DMSO- $d_6$ ):  $\delta$  ppm 166.85, 158.81, 130.16, 128.02, 125.03, 123.02, 115.29, 33.79; HRMS: for C<sub>8</sub>H<sub>10</sub>FN<sub>2</sub>O<sub>2</sub>S [M+1]<sup>+</sup>, calcd.: 201.0498, obs.: 201.0506.

*2-(2-chlorophenylthio)acetohydrazide (Table 1, Compound 9)*

<sup>1</sup>H-NMR (700 MHz, DMSO-*d*<sub>6</sub>): δ ppm 10.61 (1 H, br. s.), 7.47 (2 H, dt, *J*=7.78, 1.20 Hz), 7.33 (1 H, td, *J*=7.63, 1.50 Hz), 7.20 - 7.24 (1 H, m), 3.96 (2 H, s), 3.56 (2 H, s); <sup>13</sup>C-NMR (176 MHz, DMSO-*d*<sub>6</sub>): δ ppm 167.13, 134.73, 130.74, 129.45, 127.82, 127.59, 126.91, 32.53; HRMS: for C<sub>8</sub>H<sub>10</sub>CIN<sub>2</sub>OS [M+1]<sup>+</sup>, calcd.: 217.0202, obs.: 217.0212.

*2-(2-hydroxyphenylthio)acetohydrazide (Table 1, Compound 10)*

<sup>1</sup>H-NMR (700 MHz, DMSO-*d*<sub>6</sub>): δ ppm 9.24 (1 H, br. s.), 7.25 (1 H, dd, *J*=7.78, 1.80 Hz), 7.05 (1 H, td, *J*=7.63, 1.50 Hz), 6.81 (1 H, dd, *J*=8.08, 1.20 Hz), 6.76 (1 H, td, *J*=7.48, 1.20 Hz), 4.29 (2 H, br. s.), 3.49 (2 H, s); <sup>13</sup>C-NMR (176 MHz, DMSO-*d*<sub>6</sub>): δ ppm 167.82, 155.40, 129.81, 127.52, 121.74, 119.53, 115.05, 34.22; HRMS: for C<sub>8</sub>H<sub>11</sub>N<sub>2</sub>O<sub>2</sub>S [M+1]<sup>+</sup>, calcd.: 199.0541, obs.: 199.0549.

*2-(2-aminophenylthio)acetohydrazide (Table 1, Compound 11)*

<sup>1</sup>H-NMR (700 MHz, DMSO-*d*<sub>6</sub>): δ ppm 9.15 (1 H, br. s.), 7.24 (1 H, dd, *J*=7.78, 1.50 Hz), 6.99 - 7.05 (1 H, m), 6.69 (1 H, dd, *J*=8.08, 1.20 Hz), 6.49 (1 H, td, *J*=7.33, 1.20 Hz), 5.41 (2 H, s), 4.24 (2 H, br. s.), 3.31 (2 H, s); <sup>13</sup>C-NMR (176 MHz, DMSO-*d*<sub>6</sub>): δ ppm 167.79, 149.45, 134.93, 129.53, 116.29, 115.92, 115.67, 114.39, 36.30; HRMS: for C<sub>8</sub>H<sub>12</sub>N<sub>3</sub>O<sub>2</sub>S [M+1]<sup>+</sup>, calcd.: 198.0701, obs.: 198.0696.

*2-(*o*-tolylthio)acetohydrazide (Table 1, Compound 12)*

<sup>1</sup>H-NMR (700 MHz, DMSO-*d*<sub>6</sub>): δ ppm 9.25 (1 H, s), 7.30 - 7.35 (1 H, m), 7.15 - 7.20 (2 H, m), 7.07 - 7.12 (1 H, m), 4.28 (2 H, s), 3.58 (2 H, s), 2.28 (3 H, s); <sup>13</sup>C-NMR (176 MHz, DMSO-*d*<sub>6</sub>): δ ppm 167.10, 135.80, 135.38, 129.85, 126.96, 126.57, 125.49, 34.11, 19.75. HRMS: for C<sub>9</sub>H<sub>13</sub>N<sub>2</sub>O<sub>2</sub>S [M+1]<sup>+</sup>, calcd.: 197.0749, obs.: 197.0746.

*2-(2-methoxyphenylthio)acetohydrazide (Table 1, Compound 13)*

$^1\text{H-NMR}$  (700 MHz,  $\text{DMSO-}d_6$ ):  $\delta$  ppm 9.22 (1 H, br. s.), 7.27 (1 H, dd,  $J=7.78, 1.50$  Hz), 7.14 - 7.20 (1 H, m), 6.97 (1 H, dd,  $J=8.08, 1.20$  Hz), 6.92 (1 H, td,  $J=7.48, 1.20$  Hz), 3.81 (3 H, s), 4.26 (2 H, s), 3.52 (2 H, s);  $^{13}\text{C-NMR}$  (176 MHz,  $\text{DMSO-}d_6$ ):  $\delta$  ppm 167.31, 155.97, 127.42, 126.67, 124.42, 120.96, 110.73, 55.70, 33.09. HRMS: for  $\text{C}_9\text{H}_{12}\text{N}_2\text{O}_2\text{S}$   $[\text{M}+1]^+$ , calcd.: 213.0698, obs.: 213.0697.

*N'*-{2-[(4-nitrophenyl)sulfanyl]acetyl}acetohydrazide (**Table 1, Compound 14**)

$^1\text{H-NMR}$  (700 MHz,  $\text{DMSO-}d_6$ ):  $\delta$  ppm 10.20 (1 H, s), 9.94 (1 H, s), 8.10 - 8.15 (2 H, m), 7.56 - 7.61 (2 H, m), 3.92 (2 H, s), 1.85 (3 H, s);  $^{13}\text{C-NMR}$  (176 MHz,  $\text{DMSO-}d_6$ ):  $\delta$  ppm 167.88, 166.03, 146.76, 144.65, 126.45, 123.75, 32.99, 20.38. HRMS: for  $\text{C}_{10}\text{H}_{12}\text{N}_3\text{O}_4\text{S}$   $[\text{M}+1]^+$ , calcd.: 270.0549, obs.: 270.0557.

1-(2-nitrophenylthio)butan-2-one (**Table 1, Compound 15**)

$^1\text{H-NMR}$  (700 MHz,  $\text{DMSO-}d_6$ ):  $\delta$  ppm 8.19 (1 H, dd,  $J=8.23, 1.35$  Hz), 7.68 (1 H, ddd,  $J=8.30, 7.11, 1.35$  Hz), 7.47 (1 H, dd,  $J=8.23, 1.05$  Hz), 7.39 (1 H, ddd,  $J=8.38, 7.18, 1.20$  Hz), 4.24 (2 H, s), 2.63 (2 H, q,  $J=7.28$  Hz), 0.92 - 0.98 (3 H, m);  $^{13}\text{C-NMR}$  (176 MHz,  $\text{DMSO-}d_6$ ):  $\delta$  ppm 205.07, 145.58, 135.70, 134.14, 127.61, 125.85, 125.43, 41.59, 34.19, 7.61. HRMS: for  $\text{C}_{10}\text{H}_{12}\text{NO}_3\text{S}$   $[\text{M}+1]^+$ , calcd.: 226.0538, obs.: 226.0542.

2-(2-nitrophenylthio)acetamide (**Table 1, Compound 16**)

$^1\text{H-NMR}$  (700 MHz,  $\text{DMSO-}d_6$ ):  $\delta$  ppm 8.20 (1 H, dd,  $J=8.23, 1.35$  Hz), 7.72 (1 H, ddd,  $J=8.38, 7.18, 1.50$  Hz), 7.68 (1 H, br. s.), 7.63 (1 H, dd,  $J=8.23, 1.05$  Hz), 7.40 (1 H, ddd,  $J=8.15, 7.11, 1.20$  Hz), 7.26 (1 H, br. s.), 3.78 (2 H, s);  $^{13}\text{C-NMR}$  (176 MHz,  $\text{DMSO-}d_6$ ):  $\delta$  ppm 169.10, 145.34, 136.55, 134.22, 127.31, 125.86, 125.39, 35.68. HRMS: for  $\text{C}_8\text{H}_9\text{N}_2\text{O}_3\text{S}$   $[\text{M}+1]^+$ , calcd.: 213.0334, obs.: 213.0334.

1-(2-nitrophenylthio)propan-2-one (**Table 1, Compound 17**)

<sup>1</sup>H-NMR (700 MHz, DMSO-*d*<sub>6</sub>): δ ppm 8.20 (1 H, dd, *J*=8.38, 1.50 Hz), 7.68 (1 H, td, *J*=7.78, 1.50 Hz), 7.47 (1 H, dd, *J*=8.08, 0.90 Hz), 7.36 - 7.42 (1 H, m), 4.25 (2 H, s), 2.26 (3 H, s); <sup>13</sup>C-NMR (176 MHz, DMSO-*d*<sub>6</sub>): δ ppm 202.49, 145.56, 135.59, 134.17, 127.55, 125.89, 125.47, 42.51, 28.89. HRMS: for C<sub>9</sub>H<sub>10</sub>NO<sub>3</sub>S [M+1]<sup>+</sup>, calcd.: 212.0381, obs.: 212.0390.

*2-(2-nitrophenylthio)acetic acid (Table 1, Compound 18)*

<sup>1</sup>H-NMR (700 MHz, DMSO-*d*<sub>6</sub>): δ ppm 10.55 (1 H, br. s.), 8.21 (1 H, dd, *J*=8.23, 1.35 Hz), 7.70 - 7.75 (1 H, m), 7.59 (1 H, dd, *J*=8.23, 1.05 Hz), 7.41 (1 H, ddd, *J*=8.15, 7.11, 1.20 Hz), 4.01 (2 H, s); <sup>13</sup>C-NMR (176 MHz, DMSO-*d*<sub>6</sub>): δ ppm 169.98, 145.43, 135.83, 134.30, 127.32, 125.91, 125.55, 34.35. HRMS: for C<sub>9</sub>H<sub>10</sub>NO<sub>3</sub>S [M+NH<sub>4</sub>]<sup>+</sup>, calcd.: 231.0440, obs.: 231.0429.

*2-(methylthio)acetohydrazide (Table 1, Compound 19)*

<sup>1</sup>H-NMR (700 MHz, DMSO-*d*<sub>6</sub>): δ ppm 9.10 (1 H, br. s.), 4.10 (2 H, br. s.), 3.00 (2 H, s), 2.09 (3 H, s); <sup>13</sup>C-NMR (176 MHz, DMSO-*d*<sub>6</sub>): δ ppm 168.38, 34.59, 15.53. HRMS: for C<sub>3</sub>H<sub>9</sub>N<sub>2</sub>OS [M+1]<sup>+</sup>, calcd.: 121.0436, obs.: 121.0444.

*2-mercaptoacetohydrazide (Table 1, Compound 20)*

<sup>1</sup>H-NMR (700 MHz, DMSO-*d*<sub>6</sub>): δ ppm 9.05 (1 H, br. s.), 4.36 (2 H, br. s.), 3.04 (1 H, br. s.), 1.74 (2 H, s); <sup>13</sup>C-NMR (176 MHz, DMSO-*d*<sub>6</sub>): δ ppm 169.40, 33.49. HRMS: for C<sub>2</sub>H<sub>7</sub>N<sub>2</sub>OS [M+1]<sup>+</sup>, calcd.: 106.0201, obs.: 106.0213.

*butyrohydrazide (Table 1, Compound 21)*

<sup>1</sup>H-NMR (700 MHz, DMSO-*d*<sub>6</sub>): δ ppm 8.90 (1 H, br. s.), 4.14 (2 H, br. s.), 1.97 (2 H, t, *J*=7.48 Hz), 1.48 - 1.52 (2 H, m), 0.84 (3 H, t, *J*=7.33 Hz); <sup>13</sup>C-NMR (176 MHz, DMSO-

$d_6$ ):  $\delta$  ppm 170.90, 35.37, 18.62, 13.62. HRMS: for  $C_4H_{10}N_2O$   $[M+1]^+$ , calcd.: 102.0793, obs.: 102.0804.

*propionohydrazide (Table 1, Compound 22)*

$^1H$ -NMR (700 MHz,  $DMSO-d_6$ ):  $\delta$  ppm 0.98 (3 H, t,  $J=7.63$  Hz), 2.00 (2 H, q,  $J=7.48$  Hz), 4.13 (2 H, br. s.), 8.89 (1 H, br. s.);  $^{13}C$ -NMR (176 MHz,  $DMSO-d_6$ ):  $\delta$  ppm 172.46, 26.66, 9.98. HRMS: for  $C_3H_8N_2O$   $[M+1]^+$ , calcd.: 88.0637, obs.: 88.0632.

*acetohydrazide (Table 1, Compound 23)*

$^1H$ -NMR (700 MHz,  $DMSO-d_6$ ):  $\delta$  ppm 8.92 (1 H, br. s.), 4.13 (2 H, br. s.), 1.74 (3 H, s);  $^{13}C$ -NMR (176 MHz,  $DMSO-d_6$ ):  $\delta$  ppm 168.60, 20.50. HRMS: for  $C_2H_6N_2O$   $[M+1]^+$ , calcd.: 74.048, obs.: 74.0466.

*2,3-dihydrobenzo[b]thiophene-2-carbohydrazide (Table 1, Compound 24)*

$^1H$ -NMR (700 MHz,  $DMSO-d_6$ ):  $\delta$  ppm 11.52 (1 H, br. s.), 7.23 (1 H, d,  $J=7.18$  Hz), 7.18 (1 H, d,  $J=7.48$  Hz), 7.12 (1 H, t,  $J=7.33$  Hz), 7.03 (1 H, td,  $J=7.41, 1.05$  Hz), 4.61 (1 H, dd,  $J=8.83, 4.94$  Hz), 3.52 (1 H, dd,  $J=16.16, 4.79$  Hz), 3.46 (1 H, dd,  $J=16.01, 8.83$  Hz);  $^{13}C$ -NMR (176 MHz,  $DMSO-d_6$ ):  $\delta$  ppm 170.43, 138.94, 138.88, 127.50, 124.69, 124.64, 121.27, 46.30, 37.38. HRMS: for  $C_9H_{11}N_2OS$   $[M+1]^+$ , calcd.: 195.0592, obs.: 195.0597.

*2-(benzylthio)acetohydrazide (Table 1, Compound 25)*

$^1H$ -NMR (700 MHz,  $DMSO-d_6$ ):  $\delta$  ppm 9.12 (1 H, br. s.), 7.31 - 7.34 (4 H, m), 7.22 - 7.27 (1 H, m), 4.26 (2 H, s), 3.82 (2 H, s), 2.97 (2 H, s);  $^{13}C$ -NMR (176 MHz,  $DMSO-d_6$ ):  $\delta$  ppm 168.26, 138.04, 128.94, 128.35, 126.87, 35.63, 32.09. HRMS: for  $C_9H_{13}N_2OS$   $[M+1]^+$ , calcd.: 197.0749, obs.: 197.0756.

*2-(naphthalen-2-ylthio)acetohydrazide (Table 1, Compound 26)*

<sup>1</sup>H-NMR (700 MHz, DMSO-*d*<sub>6</sub>): δ ppm 9.30 (1 H, s), 7.79 - 7.90 (4 H, m), 7.42 - 7.56 (3 H, m), 4.31 (2 H, br. s.), 3.71 (2 H, s); <sup>13</sup>C-NMR (176 MHz, DMSO-*d*<sub>6</sub>): δ ppm 167.16, 133.77, 133.30, 131.13, 128.26, 127.59, 126.88, 126.68, 126.31, 125.65, 125.27, 34.57. HRMS: for C<sub>12</sub>H<sub>13</sub>N<sub>2</sub>OS [M+1]<sup>+</sup>, calcd.: 233.0749, obs.: 233.0746.

*2-(pyridin-4-ylthio)acetohydrazide (Table 1, Compound 27)*

<sup>1</sup>H-NMR (700 MHz, DMSO-*d*<sub>6</sub>): δ ppm 11.90 (1 H, br. s.), 8.65 - 8.70 (2 H, m), 7.93 - 8.00 (2 H, m), 4.33 (2 H, s), 3.55 (2 H, s); <sup>13</sup>C-NMR (176 MHz, DMSO-*d*<sub>6</sub>): δ ppm 166.01, 161.30, 139.81, 122.44, 66.35, 31.84. HRMS: for C<sub>7</sub>H<sub>10</sub>N<sub>3</sub>OS [M+1]<sup>+</sup>, calcd.: 184.0545, obs.: 184.0550.

*2-(2-nitrophenyl)acetohydrazide (Table 1, Compound 28)*

<sup>1</sup>H-NMR (700 MHz, DMSO-*d*<sub>6</sub>): δ ppm 9.18 (1 H, br. s.), 7.98 (1 H, dd, *J*=8.23, 1.35 Hz), 7.66 (1 H, td, *J*=7.48, 1.20 Hz), 7.51 - 7.54 (1 H, m), 7.48 (1 H, dd, *J*=7.63, 1.05 Hz), 4.19 (2 H, s), 3.80 (2 H, s); <sup>13</sup>C-NMR (176 MHz, DMSO-*d*<sub>6</sub>): δ ppm 168.12, 149.24, 133.26, 133.15, 130.55, 128.16, 124.44, 37.35. HRMS: for C<sub>8</sub>H<sub>10</sub>N<sub>3</sub>O<sub>3</sub> [M+1]<sup>+</sup>, calcd.: 196.0722, obs.: 196.0732.

#### 4. SUPPLEMENTARY REFERENCES

1. Morrison, J. F. & Walsh, C. T. The behavior and significance of slow-binding enzyme inhibitors. *Adv Enzymol Relat Areas Mol Biol* **61**, 201-301 (1988).
2. Copeland, R. A. *Enzymes: A Practical Introduction to Structure, Mechanism, and Data Analysis* (Wiley, New York, 2004).
3. Stauffer, G. V. in *Escherichia coli and Salmonella: Cellular and Molecular Biology* (eds. Böck, A. et al.) (ASM Press, Washington, D.C., 2004).
4. Walsh, C., Erion, M., Walts, A., Delany, J. & Berchtold, G. Chorismate aminations: partial purification of *Escherichia coli* PABA synthase and mechanistic comparison with anthranilate synthase. *Biochemistry* **26**, 4734-4779 (1987).
